# Supplementary material for: A Comparison of β–Phenyl Elimination in Nickel and Palladium Alkyl Complexes: A Potentially Relevant Process in the Mizoroki–Heck Reaction
Source: MDPI journal article supplement (doi:10.3390/inorganics12030089), 2024-03-14
Supplement: s1 [file s1]

## Supplementary Information

# A Comparison of $\beta$ -Phenyl Elimination in Nickel and Palladium Alkyl Complexes: A Potentially Relevant Process in the Mizoroki–Heck Reaction

Jorge A. López, Diego A. Cabo, Pilar Palma and Juan Cámpora \*

Instituto de Investigaciones Químicas, CSIC—Universidad de Sevilla, Centro de Investigaciones Científicas “Isla de la Cartuja”, C/Américo Vespucio, 49, 41092 Sevilla, Spain; albinol@ugto.mx (J.A.L.); diego.cabo@iiq.csic.es (D.A.C.); ppalma@iiq.csic.es (P.P.)

\* Correspondence: campora@iiq.csic.es

### SUPPLEMENTARY INFORMATION

*Detail of Computational Results: Energy Components and Molecular Structures (Ball and Spoke Molecular views and Fractional Coordinates) for optimized stationary point geometries.*

| CONTENTS                                                                                                                                                             | Page |
|----------------------------------------------------------------------------------------------------------------------------------------------------------------------|------|
| <b>1. Effect of the steric bulk of diphosphine ligands on the <math>\pi</math>-arene interaction in cationic diphosphine neophyl-nickel and Palladium complexes.</b> |      |
| <b>Figure S1.</b> Tube molecular views and distances in nickel and palladium $\sigma,\pi$ -complexes .....                                                           | 3    |
| <b>Table S1.</b> Fractional coordinates for the DiPPE and DtBPE Ni complexes.....                                                                                    | 3    |
| <b>2. Conformational isomers of the neophyl-nickel DMPE triflate species [Ni(CH<sub>2</sub>CMe<sub>2</sub>Ph)(DMPE)OTf]</b>                                          |      |
| <b>Table S2.</b> Energies and relative stability of DMPE-stabilized neophylnickel-triflate conformational isomers.....                                               | 4    |
| <b>3. Energy Components, and Optimized Geometries for all stationary points involved in <math>\beta</math>-Ph Elimination and Hydrolyses Reactions.</b>              |      |
| <b>Table S3.</b> SCF, ZPE, and G° Energies for species involved in $\beta$ -Ph eliminations and hydrolysis reactions.....                                            | 7    |
| <b>Table S4.</b> Molecular structures and fractional coordinates of the species involved in $\beta$ -Ph elimination and hydrolysis.....                              | 9    |



**1. Effect of the steric bulk of diphosphine ligands on the  $\pi$ -arene interaction in cationic diphosphine neophyl-nickel and Palladium complexes.**

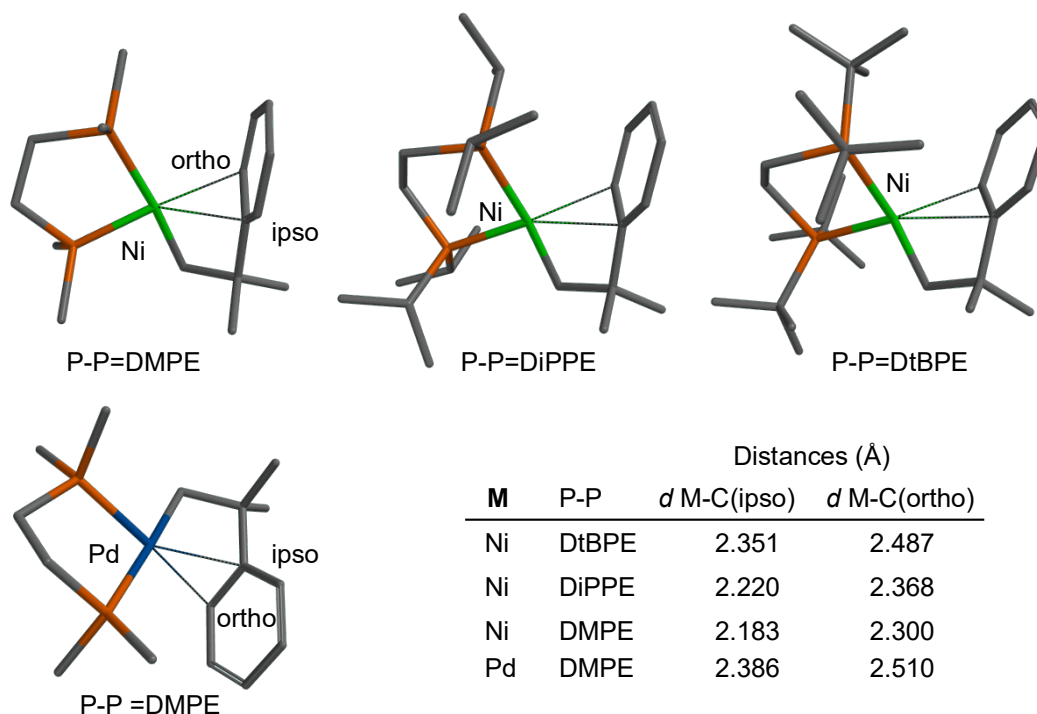

**Figure S1.** Tube molecular views and distances in nickel and palladium  $\sigma,\pi$ -complexes (H-atoms omitted for clarity).

**Table S1.** Fractional coordinates for the DiPPE and DtBPE Ni complexes (for DMPE derivatives, see Table S3)

|                                                     |  |  |  |   |           |           |           |
|-----------------------------------------------------|--|--|--|---|-----------|-----------|-----------|
| <b>[Ni(CH<sub>2</sub>CMe<sub>2</sub>Ph)(DiPPE)]</b> |  |  |  | C | -1.018500 | 4.071156  | -1.495154 |
|                                                     |  |  |  | C | 2.682241  | -1.830312 | -0.918244 |
|                                                     |  |  |  | C | 3.193487  | -2.462044 | -2.205309 |
|                                                     |  |  |  | C | 1.047221  | 0.136313  | -2.346260 |
|                                                     |  |  |  | C | -0.312484 | 3.156048  | -0.507868 |
|                                                     |  |  |  | C | 3.622762  | -0.738134 | -0.420875 |
|                                                     |  |  |  | C | -3.362289 | 2.084276  | 0.299187  |
|                                                     |  |  |  | C | -3.163911 | -0.055834 | -0.984269 |
|                                                     |  |  |  | C | -0.253965 | 0.918657  | -2.363698 |
|                                                     |  |  |  | C | 1.202648  | 3.267700  | -0.616133 |
|                                                     |  |  |  | H | 0.943588  | -2.644688 | 1.403243  |
|                                                     |  |  |  | H | -0.677907 | 5.105488  | -1.351762 |
|                                                     |  |  |  | H | -2.107968 | 4.068026  | -1.373908 |
|                                                     |  |  |  | H | -0.793264 | 3.803995  | -2.536558 |
|                                                     |  |  |  | H | 4.233684  | -2.785147 | -2.066846 |
|                                                     |  |  |  | H | 3.186853  | -1.749684 | -3.041295 |
|                                                     |  |  |  | H | 1.890914  | 0.789910  | -2.086541 |
|                                                     |  |  |  | H | -1.014874 | -3.229586 | 2.676118  |
|                                                     |  |  |  | H | 0.886512  | -2.798343 | 4.333042  |
|                                                     |  |  |  | H | -0.130398 | -3.740534 | 0.095966  |
|                                                     |  |  |  | H | -0.694232 | -4.533434 | -1.374517 |
|                                                     |  |  |  | H | 0.793613  | -2.892333 | -3.598874 |
|                                                     |  |  |  | H | -0.899437 | -3.383623 | -3.490505 |
|                                                     |  |  |  | H | -0.187083 | -2.465014 | -1.683587 |
|                                                     |  |  |  | H | -0.185653 | -2.601669 | -3.200395 |
|                                                     |  |  |  | H | 0.025335  | -3.801716 | -0.986107 |
|                                                     |  |  |  | H | 2.618101  | -3.345205 | -2.503262 |
|                                                     |  |  |  | H | -0.257631 | -0.052475 | -1.079159 |
|                                                     |  |  |  | C | -2.645213 | 1.366897  | -0.832108 |

|                                                     |           |           |           |   |           |           |           |
|-----------------------------------------------------|-----------|-----------|-----------|---|-----------|-----------|-----------|
| H                                                   | 1.278107  | -0.304688 | -3.325423 | C | 0.324196  | -2.907208 | -1.593856 |
| H                                                   | -0.495576 | -1.681195 | -3.708197 | C | -1.142945 | -2.931382 | -1.163119 |
| H                                                   | 4.595387  | -1.171158 | -0.156196 | C | 0.370447  | -3.052561 | -3.115834 |
| H                                                   | 3.234150  | -0.218331 | 0.464895  | C | 1.046369  | -4.099953 | -0.969095 |
| H                                                   | 3.807044  | 0.015458  | -1.198384 | H | -1.576411 | -3.906659 | -1.425506 |
| H                                                   | -4.417726 | 2.231361  | 0.035261  | H | -1.275017 | -2.787477 | -0.083935 |
| H                                                   | -2.939251 | 3.069849  | 0.530454  | H | 3.318891  | -2.913899 | -2.416186 |
| H                                                   | -3.338611 | 1.487210  | 1.218390  | H | 0.000392  | -4.053234 | -3.377925 |
| H                                                   | -2.913433 | -0.662276 | -0.100928 | H | 1.379800  | -2.960234 | -3.531856 |
| H                                                   | -2.765749 | -0.564868 | -1.870696 | H | 0.501429  | -5.012594 | -1.247216 |
| H                                                   | -1.055591 | 0.319420  | -2.816583 | H | 1.077895  | -4.066536 | 0.124582  |
| H                                                   | -0.167210 | 1.824266  | -2.978434 | H | 2.069913  | -4.214219 | -1.341329 |
| H                                                   | 1.534241  | 4.280383  | -0.353164 | H | 3.056410  | -3.164165 | 0.278526  |
| H                                                   | 1.540082  | 3.076063  | -1.644665 | H | -1.920255 | -2.757691 | 2.497685  |
| H                                                   | 1.722686  | 2.560458  | 0.045518  | H | -0.074243 | -2.999106 | 4.250362  |
| Ni                                                  | 0.234756  | -0.152849 | 0.726798  | C | -2.816818 | 1.333317  | -0.629349 |
| P                                                   | 0.966783  | -1.150320 | -1.035394 | C | -0.351481 | 3.603673  | -2.295087 |
| P                                                   | -0.795247 | 1.366762  | -0.644085 | C | 2.963581  | -1.317541 | -0.948407 |
| C                                                   | 0.998412  | -1.619920 | 1.782535  | C | 3.526718  | -1.848647 | -2.266436 |
| C                                                   | 0.882665  | 1.023779  | 2.677560  | C | 0.774822  | -0.094461 | -2.456836 |
| C                                                   | -0.217372 | 0.152287  | 2.878728  | C | -0.203141 | 3.019801  | -0.892221 |
| C                                                   | 0.721278  | 2.412983  | 2.753146  | C | 3.472863  | 0.107981  | -0.719019 |
| C                                                   | 0.038613  | -1.362921 | 2.938611  | C | -3.349179 | -0.080092 | -0.878686 |
| C                                                   | -1.245886 | -2.158407 | 2.721626  | C | 3.478183  | -2.158113 | 0.219245  |
| C                                                   | -0.528129 | 2.957470  | 3.021728  | C | -0.858808 | 3.949964  | 0.124884  |
| C                                                   | 0.649677  | -1.726356 | 4.295163  | C | -3.425132 | 2.269636  | -1.669152 |
| C                                                   | -1.480172 | 0.733732  | 3.105525  | C | -0.619778 | 0.501872  | -2.387366 |
| C                                                   | -1.628935 | 2.112803  | 3.191580  | C | -3.259942 | 1.729139  | 0.777710  |
| H                                                   | 2.046061  | -1.399685 | 2.028662  | C | 1.289085  | 2.935230  | -0.568939 |
| H                                                   | 1.890486  | 0.619292  | 2.581051  | H | 0.203991  | -2.801114 | 1.414923  |
| H                                                   | 1.587049  | 3.062341  | 2.616274  | H | 0.021630  | 4.637673  | -2.284411 |
| H                                                   | -1.741412 | -1.883652 | 1.778385  | H | -1.386376 | 3.636435  | -2.650120 |
| H                                                   | -1.966960 | -2.015810 | 3.536070  | H | 0.249110  | 3.060755  | -3.035043 |
| H                                                   | -0.651671 | 4.039170  | 3.092395  | H | -1.734092 | -2.171759 | -1.684423 |
| H                                                   | 1.577377  | -1.169040 | 4.475942  | H | 4.619691  | -1.734347 | -2.253180 |
| H                                                   | -0.048279 | -1.502935 | 5.114979  | H | 3.155611  | -1.296733 | -3.139039 |
| H                                                   | -2.352179 | 0.093434  | 3.243351  | H | 1.532607  | 0.694382  | -2.404537 |
| H                                                   | -2.614857 | 2.537338  | 3.384893  | H | 0.946808  | -0.607460 | -3.410287 |
| H                                                   | -2.826258 | 1.912517  | -1.773603 | H | -0.281177 | -2.331604 | -3.623243 |
| H                                                   | 2.614443  | -2.610948 | -0.144346 | H | 4.547850  | 0.060676  | -0.498756 |
| H                                                   | -1.178699 | -2.090134 | -1.383386 | H | 2.981895  | 0.586837  | 0.140168  |
| H                                                   | -0.611905 | 3.443185  | 0.511263  | H | 3.358834  | 0.755079  | -1.594776 |
| <b>[Ni(CH<sub>2</sub>CMe<sub>2</sub>Ph)(DtBPE)]</b> |           |           |           | H | -4.417072 | -0.104190 | -0.622841 |
| 84                                                  |           |           |           | H | -2.848715 | -0.829580 | -0.252472 |
|                                                     |           |           |           | H | -3.266728 | -0.394546 | -1.924851 |
|                                                     |           |           |           | H | 4.565632  | -2.267088 | 0.106682  |
|                                                     |           |           |           | H | 3.309071  | -1.655844 | 1.177259  |
| H                                                   | -4.518756 | 2.157569  | -1.649987 | H | -0.307171 | 4.900519  | 0.141290  |

|    |           |           |           |   |           |           |          |
|----|-----------|-----------|-----------|---|-----------|-----------|----------|
| H  | -0.829050 | 3.539637  | 1.140605  | C | 1.389607  | 2.109495  | 2.914562 |
| H  | -1.898362 | 4.186607  | -0.124853 | C | -0.367736 | -1.310128 | 2.908369 |
| H  | -3.093924 | 2.031858  | -2.688351 | C | -1.820958 | -1.669902 | 2.598545 |
| H  | -3.210487 | 3.325315  | -1.472472 | C | 0.389777  | 2.953371  | 3.379367 |
| H  | -1.368213 | -0.284872 | -2.532069 | C | 0.025713  | -1.905535 | 4.267039 |
| H  | -0.785211 | 1.225697  | -3.194425 | C | -1.151232 | 1.091430  | 3.431368 |
| H  | -4.358073 | 1.762746  | 0.806291  | C | -0.885122 | 2.437825  | 3.638282 |
| H  | -2.894830 | 2.706458  | 1.104657  | H | 1.578630  | -1.925746 | 2.120376 |
| H  | -2.937872 | 0.983612  | 1.513907  | H | 1.955558  | 0.094445  | 2.443448 |
| H  | 1.712271  | 3.949891  | -0.554363 | H | 2.391425  | 2.496427  | 2.722861 |
| H  | 1.848047  | 2.370660  | -1.321820 | H | -2.160866 | -1.221756 | 1.652668 |
| H  | 1.476124  | 2.480274  | 0.409899  | H | -2.513236 | -1.350813 | 3.386706 |
| Ni | 0.119078  | -0.281565 | 0.682555  | H | 0.597240  | 4.011624  | 3.545057 |
| P  | 1.068365  | -1.239310 | -1.027769 | H | 1.064878  | -1.662226 | 4.520818 |
| P  | -0.919242 | 1.258679  | -0.723211 | H | -0.622815 | -1.515109 | 5.064421 |
| C  | 0.537669  | -1.832636 | 1.798765  | H | -2.144092 | 0.705206  | 3.661288 |
| C  | 1.126462  | 0.749947  | 2.708996  | H | -1.675021 | 3.094590  | 4.006182 |
| C  | -0.154989 | 0.213306  | 2.964308  |   |           |           |          |

## 2. Conformational isomers of the neophyl-nickel DMPE triflate species $[\text{Ni}(\text{CH}_2\text{CMe}_2\text{Ph})(\text{DMPE})\text{OTf}]$

**Table S2.** Energies and relative stability of DMPE-stabilized neophylnickel-triflate conformational isomers.

| Conformer No. | M06-L/SPVD/CPCM (dichloromethane) |              |         | Single point<br>M06-L/SVPD (g)<br>E(SCF,g) | Corrections <sup>a</sup> |         | Single point<br>M06/TZVPPD<br>E(SCF,g) | G° estim <sup>b</sup> | $\Delta G^\circ$ |
|---------------|-----------------------------------|--------------|---------|--------------------------------------------|--------------------------|---------|----------------------------------------|-----------------------|------------------|
|               | E(SCF)                            | G°           | ZPE     |                                            | TC                       | SC      |                                        |                       |                  |
| Ni-M0001      | -2370894,423                      | -2370651,774 | 275,656 | -2370879,625                               | 242,649                  | -14,798 | -2371688,892                           | -2371461,041          | 0,00             |
| Ni-M0005      | -2370894,56                       | -2370650,548 | 276,682 | -2370876,623                               | 244,012                  | -17,937 | -2371686,656                           | -2371460,581          | 0,46             |
| Ni-M0008      | -2370893,627                      | -2370649,716 | 276,578 | -2370876,553                               | 243,911                  | -17,074 | -2371686,900                           | -2371460,063          | 0,98             |
| Ni-M0003      | -2370894,381                      | -2370651,660 | 275,728 | -2370879,424                               | 242,721                  | -14,957 | -2371687,803                           | -2371460,039          | 1,00             |
| Ni-M0004      | -2370892,849                      | -2370649,101 | 276,498 | -2370876,288                               | 243,748                  | -16,561 | -2371686,570                           | -2371459,383          | 1,66             |
| Ni-M0006      | -2370892,628                      | -2370647,405 | 277,709 | -2370875,93                                | 245,223                  | -16,698 | -2371686,174                           | -2371457,649          | 3,39             |
| Ni-M0007      | -2370888,91                       | -2370644,250 | 277,250 | -2370869,696                               | 244,66                   | -19,214 | -2371679,504                           | -2371454,058          | 6,98             |

(a): Corrections (@ M06-L/SVPD): TC (Thermal Correction) =  $G(\text{solv}) - E(\text{SCF, solv})$ ; SC (solvent correction) =  $E(\text{SCF, solv}) - E(\text{SCF, g})$ . (b) G° estim. =  $E(\text{SCF, g, M06/TZVPPD}) + \text{TC} + \text{SC}$

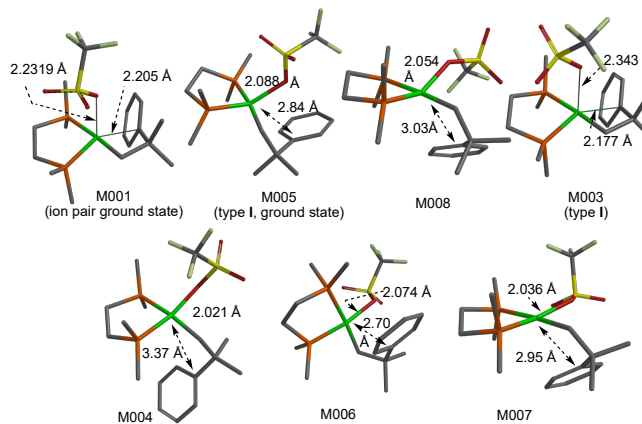

**Figure S2.** Geometries of seven neophylnickel-triflate conformational isomers. H atoms omitted for clarity, in order of increasing energy..

### 3. Energy Components and Optimized Geometries for all stationary points involved in $\beta$ -Ph Elimination and Hydrolyses Reactions.

**Table S3.** SCF, ZPE, and  $G^\circ$  Energies for species involved in c  $\beta$ -Ph eliminations and hydrolysis reactions

| Species                                                           | M06-L/SPVD                   |              |              |         | Single point<br>M06-L/SVPD (g)<br>E(SCF,g) | Corrections <sup>a</sup> |          | Single point<br>M06/TZVPPD<br>E(SCF,g) | $G^\circ$ estim <sup>b</sup><br>E(SCF)+TC+SC |
|-------------------------------------------------------------------|------------------------------|--------------|--------------|---------|--------------------------------------------|--------------------------|----------|----------------------------------------|----------------------------------------------|
|                                                                   | i-Frq<br>(cm <sup>-1</sup> ) | E(SCF)       | $G^\circ$    | ZPE     |                                            | TC                       | SC       |                                        |                                              |
| triflate(-)                                                       |                              | -603054,637  | -603057,713  | 16,770  | -603004,932                                | -3,076                   | -49,705  | -603424,817                            | -603477,598                                  |
| CH <sub>2</sub> =CMe <sub>2</sub>                                 |                              | -98576,776   | -98526,846   | 67,043  | -98575,437                                 | 49,93                    | -1,339   | -98614,31                              | -98565,719                                   |
| H <sub>2</sub> O                                                  |                              | -47925,175   | -47922,811   | 13,440  | -47919,859                                 | 2,364                    | -5,316   | -47959,482                             | -47962,434                                   |
| C <sub>6</sub> H <sub>6</sub>                                     |                              | -145617,925  | -145572,49   | 62,678  | -145615,918                                | 45,435                   | -2,007   | -145671,535                            | -145628,107                                  |
| PMe <sub>3</sub>                                                  |                              | -289213,296  | -289161,854  | 69,861  | -289210,791                                | 51,442                   | -2,505   | -289306,023                            | -289257,086                                  |
|                                                                   |                              |              |              |         |                                            |                          |          |                                        |                                              |
| <b>6'</b>                                                         |                              | -1767823,669 | -1767593,483 | 258,930 | -1767786,38                                | 230,186                  | -37,289  | -1768182,057                           | -1767989,160                                 |
| <b>TS1-Ni</b>                                                     | 261                          | -1767803,054 | -1767574,863 | 257,269 | -1767765,741                               | 228,191                  | -37,313  | -1768161,811                           | -1767970,933                                 |
| [Ni(Ph)(CH <sub>2</sub> =CMe <sub>2</sub>   )(DMPE)] <sup>+</sup> |                              | -1767812,271 | -1767584,524 | 257,149 | -1767773,174                               | 227,747                  | -39,097  | -1768169,047                           | -1767980,397                                 |
| <b>TS2-Ni</b>                                                     | 9                            | -1767810,454 | -1767582,197 | 257,518 | -1767771,788                               | 228,257                  | -38,666  | -1768167,791                           | -1767978,200                                 |
| [Ni(Ph)(CH <sub>2</sub> =CMe <sub>2</sub> ⊥)(DMPE)] <sup>+</sup>  |                              | -1767810,577 | -1767582,232 | 257,581 | -1767771,955                               | 228,345                  | -38,622  | -1768167,447                           | -1767977,724                                 |
| [Ni(Ph)(DMPE)](+)                                                 |                              | -1669207,019 | -1669045,493 | 188,221 | -1669167,165                               | 161,526                  | -39,864  | -1669528,647                           | -1669406,975                                 |
| [Ni(Ph)(H <sub>2</sub> O)(DMPE)](+)                               |                              | -1717155,662 | -1716978,895 | 204,489 | -1717111,89                                | 176,767                  | -43,772  | -1717511,141                           | -1717378,146                                 |
| <b>TS3-Ni</b>                                                     | 1588                         | -1717134,673 | -1716960,96  | 201,372 | -1717091,355                               | 173,713                  | -43,318  | -1717489,647                           | -1717359,252                                 |
| [Ni(OH)(Ph-H)(DMPE)](+)                                           |                              | -1717155,290 | -1716978,543 | 204,401 | -1717111,969                               | 176,747                  | -43,321  | -1717508,64                            | -1717375,214                                 |
| <b>cis-5a'</b>                                                    |                              | -3143106,992 | -3142854,133 | 285,219 | -3142976,648                               | 252,859                  | -130,344 | -3143659,709                           | -3143537,194                                 |
| <b>trans-5a'</b>                                                  |                              | -3143102,310 | -3142850,783 | 284,211 | -3142977,868                               | 251,527                  | -124,442 | -3143663,911                           | -3143536,826                                 |

**Table S3** (cont).

|                                                                                     |      |              |              |         |              |         |          |              |              |
|-------------------------------------------------------------------------------------|------|--------------|--------------|---------|--------------|---------|----------|--------------|--------------|
| [Ni(CH <sub>2</sub> CMe <sub>2</sub> Ph)(PMe <sub>3</sub> )(DMPE)] <sup>+</sup> (c) |      | -2057062,072 | -2056761,611 | 332,327 | -2057024,568 | 300,461 | -37,504  | -2057511,458 | -2057248,501 |
| <b>IV'</b>                                                                          |      | -2057057,207 | -2056757,714 | 331,583 | -2057020,034 | 299,493 | -37,173  | -2057505,827 | -2057243,507 |
| <b>TS4</b>                                                                          | 219  | -2057027,841 | -2056730,218 | 329,976 | -2056991,268 | 297,623 | -36,573  | -2057477,077 | -2057216,027 |
| <b>13'</b>                                                                          |      | -2057037,706 | -2056740,930 | 329,612 | -2057000,207 | 296,776 | -37,499  | -2057486,692 | -2057227,415 |
| <b>TS5</b>                                                                          | 39   | -2057037,180 | -2056740,255 | 329,670 | -2056999,873 | 296,925 | -37,307  | -2057486,295 | -2057226,677 |
| [Ni(Ph)(PMe <sub>3</sub> )(DMPE)] <sup>+</sup>                                      |      | -1958467,339 | -1958237,426 | 260,426 | -1958428,968 | 229,913 | -38,371  | -1958883,597 | -1958692,055 |
|                                                                                     |      |              |              |         |              |         |          |              |              |
| <b>1'</b>                                                                           |      | -901778,726  | -901549,236  | 258,602 | -901741,65   | 229,49  | -37,076  | -902002,587  | -901810,173  |
| <b>TS1-Pd</b>                                                                       | 319  | -901752,681  | -901524,987  | 257,106 | -901716,339  | 227,694 | -36,342  | -901977,634  | -901786,282  |
| [Pd(Ph)(CH <sub>2</sub> =CMe <sub>2</sub> -II)(DMPE)] <sup>+</sup>                  |      | -901767,748  | -901540,368  | 257,103 | -901729,549  | 227,38  | -38,199  | -901991,607  | -901802,426  |
| <b>TS2-Pd</b>                                                                       | 39   | -901767,678  | -901540,656  | 256,802 | -901729,273  | 227,022 | -38,405  | -901991,179  | -901802,562  |
| [Pd(Ph)(CH <sub>2</sub> =CMe <sub>2</sub> -I)(DMPE)] <sup>+</sup>                   |      | -901767,882  | -901540,833  | 256,845 | -901729,379  | 227,049 | -38,503  | -901991,087  | -901802,541  |
| [Pd(Ph)(DMPE)] <sup>+</sup>                                                         |      | -803165,648  | -803004,830  | 187,89  | -803125,806  | 160,818 | -39,842  | -803349,498  | -803228,522  |
| [Pd(Ph)(H <sub>2</sub> O)(DMPE)] <sup>+</sup>                                       |      | -851109,237  | -850933,664  | 203,688 | -851066,32   | 175,573 | -42,917  | -851328,606  | -851195,95   |
| <b>TS3-Pd</b>                                                                       | 1659 | -851085,166  | -850912,460  | 200,757 | -851042,190  | 172,706 | -42,976  | -851302,623  | -851172,893  |
| [Pd(OH)(η <sup>2</sup> -Ph-H)(DMPE)] <sup>+</sup>                                   |      | -851108,676  | -850932,625  | 204,062 | -851063,854  | 176,051 | -44,822  | -851323,82   | -851192,591  |
| <i>cis</i> -[Pd(μ-OH)(DMPE)] <sub>2</sub> <sup>2+</sup>                             |      | -1411001,355 | -1410750,471 | 283,926 | -1410879,234 | 250,884 | -122,121 | -1411286,985 | -1411158,222 |
| <i>trans</i> -[Pd(μ-OH)(DMPE)] <sub>2</sub> <sup>2+</sup>                           |      | -1411001,480 | -1410750,360 | 284,053 | -1410879,972 | 251,12  | -121,508 | -1411288,853 | -1411159,241 |
| [Pd(CH <sub>2</sub> CMe <sub>2</sub> Ph)(PMe <sub>3</sub> )(DMPE)] <sup>+</sup> (a) |      | -1191019,973 | -1190720,88  | 331,544 | -1190982,547 | 299,093 | -37,426  | -1191335,303 | -1191073,636 |
| [Pd(Ph)(PMe <sub>3</sub> )(DMPE)] <sup>+</sup>                                      |      | -1092422,922 | -1092193,758 | 259,919 | -1092384,63  | 229,164 | -38,292  | -1092703,712 | -1092512,840 |

(a): Corrections (@ M06-L/SVPD): TC (Thermal Correction) = G(solv)-E(SCF, solv); SC (solvent correction) = E(SCF, solv)-E(SCF, g). (b) G° estim. = E(SCF, g, M06/TZVPPD)+TC+SC. (c): Only the most stable conformer shown.



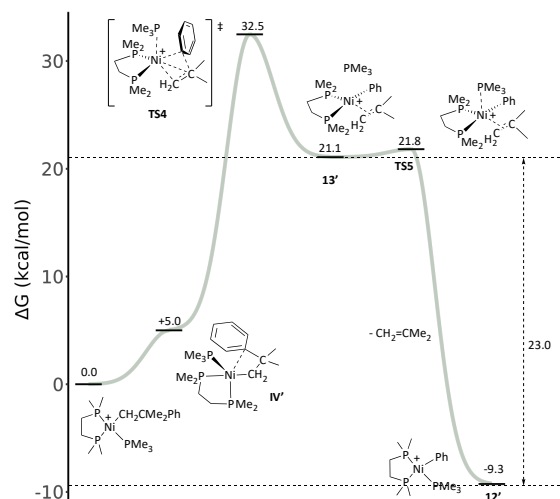

**Figure S3.** Free energy diagram corresponding to Scheme 8. All free energies in Kcal/mol.

**Table S4.** Structure and coordinates of the species involved in  $\beta$ -Ph elimination and hydrolysis

#### Water

|   |                                                                                   |          |           |
|---|-----------------------------------------------------------------------------------|----------|-----------|
| 3 |  |          |           |
|   | O                                                                                 | 0.000000 | 0.000000  |
|   | H                                                                                 | 0.000000 | -0.757387 |
| 8 | H                                                                                 | 0.000000 | 0.757387  |

#### Triflate Anion

|    |                                                                                     |           |           |
|----|-------------------------------------------------------------------------------------|-----------|-----------|
| 8  | 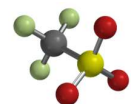 |           |           |
|    | C                                                                                   | 0.412837  | 0.702019  |
|    | F                                                                                   | -0.154696 | 1.833775  |
| 12 | F                                                                                   | 1.697625  | 0.715721  |
|    | F                                                                                   | 0.371385  | 0.702958  |
|    | S                                                                                   | -0.465655 | -0.791363 |
|    | O                                                                                   | 0.293531  | -1.919462 |
|    | O                                                                                   | -0.310056 | -0.615552 |
|    | O                                                                                   | -1.844970 | -0.628096 |

#### Benzene

|    |                                                                                     |           |           |
|----|-------------------------------------------------------------------------------------|-----------|-----------|
| 12 | 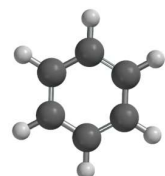 |           |           |
|    | C                                                                                   | 0.412837  | 0.702019  |
|    | F                                                                                   | -0.154696 | 1.833775  |
|    | F                                                                                   | 1.697625  | 0.715721  |
|    | F                                                                                   | 0.371385  | 0.702958  |
|    | S                                                                                   | -0.465655 | -0.791363 |

#### 12

|   |           |           |           |
|---|-----------|-----------|-----------|
| 6 | -0.365716 | -1.330453 | 0.211711  |
| 6 | 0.365716  | 1.330453  | -0.211712 |
| 6 | 0.812552  | -0.832975 | 0.770979  |
| 6 | -1.178255 | -0.497409 | -0.559355 |
| 6 | -0.812553 | 0.832975  | -0.770979 |
| 6 | 1.178255  | 0.497408  | 0.559356  |
| 1 | 1.448010  | -1.484669 | 1.374011  |
| 1 | -1.448012 | 1.484668  | -1.374012 |
| 1 | 2.099985  | 0.886313  | 0.996760  |
| 1 | 0.651807  | 2.371054  | -0.377227 |
| 1 | -0.651806 | -2.371053 | 0.377227  |
| 1 | -2.099984 | -0.886314 | -0.996758 |

#### Isobutene

|    |                                                                                       |           |           |
|----|---------------------------------------------------------------------------------------|-----------|-----------|
| 12 | 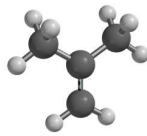 |           |           |
|    | C                                                                                     | 0.190855  | 1.450692  |
|    | H                                                                                     | 1.184164  | 1.891629  |
|    | H                                                                                     | -0.662804 | 2.071133  |
|    | C                                                                                     | 0.026411  | 0.200858  |
|    | C                                                                                     | 1.182896  | -0.662570 |
| 12 | H                                                                                     | 2.146204  | -0.157168 |
|    | H                                                                                     | 1.100889  | -0.977936 |
|    | H                                                                                     | 1.195744  | -1.592112 |
|    | C                                                                                     | -1.325149 | -0.418822 |
|    | C                                                                                     | 0.532448  | -0.080917 |

|   |           |           |           |
|---|-----------|-----------|-----------|
| H | -1.406345 | -1.339401 | 0.517427  |
| H | -1.499927 | -0.724886 | -1.123897 |
| H | -2.132938 | 0.258583  | 0.218768  |

**[Ni(CH<sub>2</sub>CMe<sub>2</sub>Ph)(DMPE)]<sup>+</sup>, 6'**

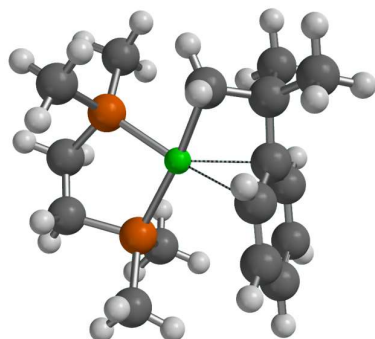

48

|    |           |           |           |
|----|-----------|-----------|-----------|
| Ni | -0.032031 | 0.391586  | -0.200987 |
| P  | -2.110095 | 0.730352  | 0.241889  |
| P  | 0.414350  | 0.604725  | 2.020948  |
| C  | -2.328355 | 0.830411  | 2.070165  |
| H  | -2.486668 | -0.197462 | 2.428099  |
| H  | -3.240523 | 1.395088  | 2.308350  |
| C  | -1.087075 | 1.436236  | 2.698742  |
| H  | -1.102070 | 1.363048  | 3.795173  |
| H  | -1.003127 | 2.504413  | 2.448708  |
| C  | -2.757281 | 2.302436  | -0.399658 |
| H  | -2.177757 | 3.138494  | 0.008679  |
| H  | -3.810487 | 2.422299  | -0.114345 |
| H  | -2.675939 | 2.323012  | -1.492280 |
| C  | -3.319007 | -0.520801 | -0.277140 |
| H  | -3.020655 | -1.504616 | 0.102857  |
| H  | -3.385175 | -0.568811 | -1.369174 |
| H  | -4.306951 | -0.265928 | 0.127424  |
| C  | 1.772275  | 1.602448  | 2.715734  |
| H  | 2.728580  | 1.081586  | 2.600581  |
| H  | 1.597095  | 1.781060  | 3.784535  |
| H  | 1.835502  | 2.565910  | 2.196533  |
| C  | 0.493560  | -0.945852 | 2.980579  |
| H  | 1.427909  | -1.474540 | 2.759316  |
| H  | -0.340223 | -1.603189 | 2.705645  |
| H  | 0.448425  | -0.738198 | 4.057767  |
| C  | -0.570608 | 0.346015  | -2.079980 |
| H  | -0.212519 | 1.319066  | -2.453143 |
| H  | -1.611908 | 0.213092  | -2.395130 |
| C  | 0.335378  | -0.820111 | -2.473032 |
| C  | 1.718081  | -1.916963 | -0.565280 |
| C  | 3.124828  | 0.463041  | -0.162410 |
| C  | 2.744558  | -1.854381 | 0.369138  |

|   |           |           |           |
|---|-----------|-----------|-----------|
| C | 1.388017  | -0.796546 | -1.357203 |
| C | 2.083372  | 0.414411  | -1.104143 |
| C | 3.462316  | -0.668486 | 0.565892  |
| H | 2.993237  | -2.742655 | 0.952209  |
| H | 4.271408  | -0.631669 | 1.296776  |
| H | 3.665123  | 1.398708  | -0.009967 |
| C | 0.994159  | -0.620393 | -3.838625 |
| H | 1.569499  | 0.313088  | -3.877398 |
| H | 0.230078  | -0.574674 | -4.626566 |
| H | 1.675702  | -1.449928 | -4.076101 |
| C | -0.460875 | -2.117892 | -2.471982 |
| H | 0.165731  | -2.987268 | -2.710152 |
| H | -1.252692 | -2.067027 | -3.229344 |
| H | -0.941058 | -2.300791 | -1.500837 |
| H | 1.187110  | -2.857358 | -0.712177 |
| H | 1.906783  | 1.285014  | -1.738682 |

**TS1-Ni**

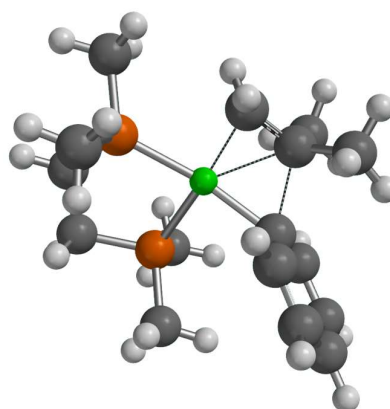

48

|    |           |           |           |
|----|-----------|-----------|-----------|
| Ni | -0.464605 | 0.019020  | -0.298265 |
| P  | -2.347074 | 0.975981  | 0.239607  |
| P  | 0.048879  | 0.098325  | 1.865265  |
| C  | -2.597419 | 0.814822  | 2.055010  |
| H  | -2.977484 | -0.201550 | 2.234418  |
| H  | -3.372694 | 1.514798  | 2.396697  |
| C  | -1.267864 | 1.032363  | 2.757591  |
| H  | -1.302595 | 0.739754  | 3.815698  |
| H  | -0.982272 | 2.093737  | 2.728888  |
| C  | -2.236874 | 2.768445  | -0.056881 |
| H  | -1.347964 | 3.181939  | 0.434435  |
| H  | -3.130160 | 3.278847  | 0.326527  |
| H  | -2.150478 | 2.956672  | -1.133498 |
| C  | -3.927882 | 0.487153  | -0.502396 |
| H  | -4.086837 | -0.589662 | -0.372972 |
| H  | -3.922402 | 0.714090  | -1.574727 |
| H  | -4.753747 | 1.032621  | -0.029427 |
| C  | 1.605789  | 0.860651  | 2.402350  |

|   |           |           |           |
|---|-----------|-----------|-----------|
| H | 2.455712  | 0.309001  | 1.983448  |
| H | 1.680587  | 0.857823  | 3.497106  |
| H | 1.650942  | 1.894757  | 2.040761  |
| C | 0.043936  | -1.549455 | 2.640782  |
| H | 0.808672  | -2.184900 | 2.179169  |
| H | -0.933588 | -2.025040 | 2.496638  |
| H | 0.249514  | -1.470367 | 3.716072  |
| C | -1.107269 | -0.250772 | -2.112465 |
| H | -1.116034 | 0.646153  | -2.741356 |
| H | -2.062703 | -0.780994 | -2.087002 |
| C | 0.096089  | -1.056843 | -2.113846 |
| C | 2.236584  | -1.420076 | -0.232088 |
| C | 3.377145  | 1.048451  | -0.854303 |
| C | 3.601883  | -1.209731 | -0.035582 |
| C | 1.423850  | -0.403738 | -0.754294 |
| C | 2.021431  | 0.828396  | -1.081162 |
| C | 4.177619  | 0.024597  | -0.339292 |
| H | 4.217190  | -2.015899 | 0.368688  |
| H | 1.417012  | 1.625071  | -1.526180 |
| H | 5.244949  | 0.187379  | -0.182699 |
| H | 3.816219  | 2.018183  | -1.097119 |
| C | 1.027470  | -0.839985 | -3.288133 |
| H | 1.165211  | 0.221050  | -3.518740 |
| H | 0.559798  | -1.310404 | -4.166016 |
| H | 2.011014  | -1.302030 | -3.137952 |
| C | -0.113420 | -2.518600 | -1.791339 |
| H | 0.828469  | -3.076306 | -1.759226 |
| H | -0.729095 | -2.964363 | -2.584658 |
| H | -0.642899 | -2.672147 | -0.841475 |
| H | 1.807394  | -2.387217 | 0.033944  |

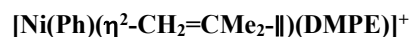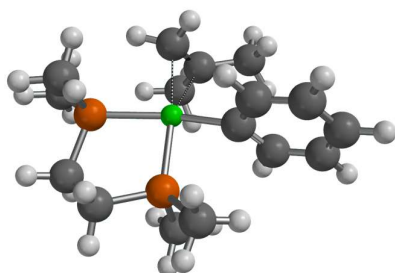

48

|    |           |           |           |
|----|-----------|-----------|-----------|
| Ni | -0.228190 | 0.114194  | -0.317903 |
| P  | -2.318913 | 0.777904  | 0.267861  |
| P  | 0.198981  | 0.172778  | 1.832268  |
| C  | -2.495727 | 0.653972  | 2.093952  |
| H  | -2.772191 | -0.384758 | 2.325302  |
| H  | -3.317184 | 1.292569  | 2.446246  |
| C  | -1.168804 | 1.019236  | 2.731115  |
| H  | -1.124799 | 0.756443  | 3.797266  |

|   |           |           |           |
|---|-----------|-----------|-----------|
| H | -0.978696 | 2.099876  | 2.659623  |
| C | -2.446744 | 2.565263  | -0.068040 |
| H | -1.597921 | 3.096031  | 0.379478  |
| H | -3.380742 | 2.971897  | 0.340917  |
| H | -2.424726 | 2.741316  | -1.150149 |
| C | -3.878551 | 0.101560  | -0.381088 |
| H | -3.977801 | -0.952357 | -0.096163 |
| H | -3.910678 | 0.172771  | -1.474882 |
| H | -4.728211 | 0.661890  | 0.028510  |
| C | 1.701972  | 0.932603  | 2.502879  |
| H | 2.587275  | 0.369424  | 2.188583  |
| H | 1.647142  | 0.945340  | 3.598736  |
| H | 1.792129  | 1.961307  | 2.135019  |
| C | 0.180282  | -1.522852 | 2.488889  |
| H | 1.006312  | -2.101984 | 2.062132  |
| H | -0.763263 | -2.016446 | 2.227616  |
| H | 0.287236  | -1.503053 | 3.581274  |
| C | -0.789148 | 0.281139  | -2.364062 |
| H | -0.131712 | 1.025795  | -2.820967 |
| H | -1.850902 | 0.524222  | -2.354267 |
| C | -0.368609 | -1.031685 | -2.279793 |
| C | 2.466611  | -1.173476 | -0.225241 |
| C | 3.722607  | 1.180057  | -1.019114 |
| C | 3.853109  | -1.143701 | -0.392551 |
| C | 1.684951  | -0.035100 | -0.459395 |
| C | 2.337125  | 1.145987  | -0.844851 |
| C | 4.486899  | 0.034233  | -0.789864 |
| H | 4.440336  | -2.046672 | -0.210500 |
| H | 1.760611  | 2.060204  | -1.021929 |
| H | 5.570409  | 0.060722  | -0.919166 |
| H | 4.207730  | 2.107707  | -1.331929 |
| C | 0.900312  | -1.488545 | -2.916594 |
| H | 1.612595  | -0.676357 | -3.090912 |
| H | 0.631119  | -1.916271 | -3.895089 |
| H | 1.393221  | -2.288872 | -2.352173 |
| C | -1.282787 | -2.124400 | -1.827988 |
| H | -0.817177 | -2.713634 | -1.022284 |
| H | -1.456209 | -2.834665 | -2.650700 |
| H | -2.253331 | -1.756939 | -1.481704 |
| H | 1.994052  | -2.114673 | 0.071629  |

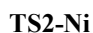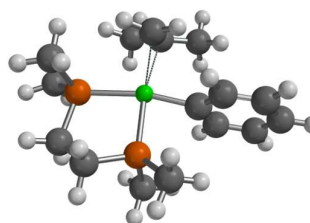

48

|    |           |           |           |
|----|-----------|-----------|-----------|
| Ni | -0.150643 | 0.134915  | -0.261119 |
| P  | -2.366429 | 0.481955  | 0.323706  |
| P  | 0.299333  | 0.380157  | 1.870481  |
| C  | -2.408561 | 0.624032  | 2.163004  |
| H  | -2.538064 | -0.393365 | 2.560202  |
| H  | -3.292611 | 1.198557  | 2.471336  |
| C  | -1.118583 | 1.237382  | 2.666933  |
| H  | -1.020048 | 1.176524  | 3.760038  |
| H  | -1.048668 | 2.300586  | 2.394413  |
| C  | -2.991294 | 2.101072  | -0.239981 |
| H  | -2.269945 | 2.891376  | 0.000578  |
| H  | -3.951603 | 2.331451  | 0.238306  |
| H  | -3.135829 | 2.088206  | -1.327298 |
| C  | -3.774610 | -0.635970 | 0.010866  |
| H  | -3.497558 | -1.672429 | 0.235183  |
| H  | -4.102698 | -0.576989 | -1.031626 |
| H  | -4.614919 | -0.344904 | 0.654172  |
| C  | 1.755324  | 1.311879  | 2.417032  |
| H  | 2.667243  | 0.744263  | 2.201434  |
| H  | 1.685208  | 1.491760  | 3.497205  |
| H  | 1.809385  | 2.273386  | 1.893839  |
| C  | 0.420754  | -1.204641 | 2.753925  |
| H  | 1.320306  | -1.740901 | 2.432614  |
| H  | -0.452714 | -1.833555 | 2.547347  |
| H  | 0.485272  | -1.019012 | 3.833879  |
| C  | -0.321758 | 0.771893  | -2.297199 |
| H  | 0.606338  | 1.321233  | -2.465736 |
| H  | -1.241570 | 1.357779  | -2.277046 |
| C  | -0.364479 | -0.584428 | -2.515892 |
| C  | 2.304591  | -1.379637 | -0.132403 |
| C  | 3.984025  | 0.704240  | -0.891860 |
| C  | 3.670720  | -1.613691 | -0.309142 |
| C  | 1.753201  | -0.109449 | -0.351016 |
| C  | 2.618315  | 0.932237  | -0.715276 |
| C  | 4.516109  | -0.571171 | -0.689855 |
| H  | 4.074437  | -2.615610 | -0.146444 |
| H  | 2.227374  | 1.941730  | -0.873108 |
| H  | 5.584533  | -0.749600 | -0.824019 |
| H  | 4.637534  | 1.528450  | -1.187009 |
| C  | 0.829040  | -1.355528 | -2.968579 |
| H  | 1.757724  | -0.779742 | -2.923015 |
| H  | 0.659705  | -1.657420 | -4.013223 |
| H  | 0.957390  | -2.286875 | -2.399671 |
| C  | -1.655388 | -1.334029 | -2.545750 |
| H  | -1.694881 | -2.107987 | -1.763649 |
| H  | -1.752768 | -1.869564 | -3.500912 |
| H  | -2.519427 | -0.672681 | -2.434512 |
| H  | 1.661189  | -2.215884 | 0.158846  |

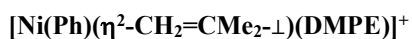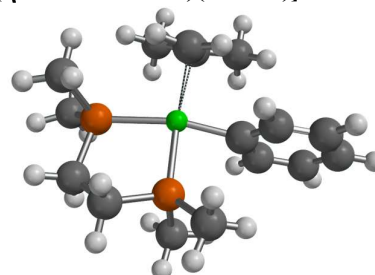

48

|    |           |           |           |
|----|-----------|-----------|-----------|
| Ni | -0.124498 | 0.164331  | -0.243528 |
| P  | -2.347766 | 0.398939  | 0.350669  |
| P  | 0.329548  | 0.457836  | 1.877188  |
| C  | -2.377962 | 0.663818  | 2.179059  |
| H  | -2.481988 | -0.327625 | 2.643161  |
| H  | -3.272025 | 1.237115  | 2.458737  |
| C  | -1.097714 | 1.333762  | 2.634733  |
| H  | -0.991095 | 1.340631  | 3.728842  |
| H  | -1.051687 | 2.379611  | 2.297585  |
| C  | -3.168622 | 1.887480  | -0.311312 |
| H  | -2.551019 | 2.772703  | -0.116083 |
| H  | -4.151839 | 2.024032  | 0.155647  |
| H  | -3.304050 | 1.795955  | -1.395973 |
| C  | -3.606773 | -0.907380 | 0.154366  |
| H  | -3.203794 | -1.870912 | 0.488051  |
| H  | -3.926001 | -1.003263 | -0.887727 |
| H  | -4.484086 | -0.659906 | 0.765719  |
| C  | 1.780184  | 1.413813  | 2.394748  |
| H  | 2.694099  | 0.841630  | 2.200827  |
| H  | 1.707435  | 1.630380  | 3.467970  |
| H  | 1.832707  | 2.357077  | 1.839252  |
| C  | 0.457797  | -1.098233 | 2.808466  |
| H  | 1.359274  | -1.638827 | 2.499488  |
| H  | -0.412425 | -1.737457 | 2.619735  |
| H  | 0.522762  | -0.882713 | 3.882765  |
| C  | -0.241506 | 0.929836  | -2.234176 |
| H  | 0.724233  | 1.421033  | -2.362005 |
| H  | -1.117006 | 1.578371  | -2.168599 |
| C  | -0.382673 | -0.401530 | -2.543779 |
| C  | 2.224394  | -1.440419 | -0.123765 |
| C  | 4.054147  | 0.512659  | -0.881976 |
| C  | 3.566463  | -1.779133 | -0.315592 |
| C  | 1.771632  | -0.129994 | -0.331730 |
| C  | 2.711366  | 0.845030  | -0.693288 |
| C  | 4.486576  | -0.802140 | -0.696415 |
| H  | 3.892604  | -2.810369 | -0.162851 |
| H  | 2.399160  | 1.883017  | -0.839919 |
| H  | 5.536680  | -1.061691 | -0.841959 |
| H  | 4.767380  | 1.286455  | -1.175093 |

|   |           |           |           |
|---|-----------|-----------|-----------|
| C | 0.762889  | -1.236799 | -3.009101 |
| H | 1.727489  | -0.728165 | -2.926509 |
| H | 0.595422  | -1.494573 | -4.065581 |
| H | 0.817829  | -2.192438 | -2.468574 |
| C | -1.725601 | -1.042092 | -2.666966 |
| H | -1.833124 | -1.901261 | -1.988010 |
| H | -1.846801 | -1.446974 | -3.682226 |
| H | -2.542967 | -0.336443 | -2.487333 |
| H | 1.520955  | -2.225177 | 0.173061  |

[Ni(Ph)(DMPE)]<sup>+</sup>

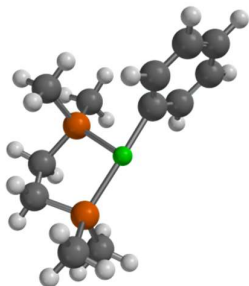

36

|    |           |           |           |
|----|-----------|-----------|-----------|
| Ni | -0.218416 | -0.212965 | -0.823579 |
| P  | -2.418431 | 0.167074  | -0.553331 |
| P  | 0.178709  | 0.290379  | 1.186674  |
| C  | -2.590724 | 0.298675  | 1.275917  |
| H  | -2.660842 | -0.725961 | 1.669102  |
| H  | -3.527329 | 0.808972  | 1.539158  |
| C  | -1.379893 | 1.017313  | 1.848002  |
| H  | -1.353584 | 0.986275  | 2.946873  |
| H  | -1.377078 | 2.078133  | 1.557981  |
| C  | -3.003425 | 1.776973  | -1.173018 |
| H  | -2.353935 | 2.581050  | -0.807293 |
| H  | -4.032134 | 1.966865  | -0.839896 |
| H  | -2.975664 | 1.788267  | -2.268861 |
| C  | -3.710596 | -1.002918 | -1.065880 |
| H  | -3.490857 | -2.001986 | -0.673004 |
| H  | -3.747024 | -1.059503 | -2.159937 |
| H  | -4.691481 | -0.677553 | -0.695803 |
| C  | 1.471459  | 1.489270  | 1.590265  |
| H  | 2.458273  | 1.049273  | 1.410235  |
| H  | 1.385583  | 1.771988  | 2.647390  |
| H  | 1.362235  | 2.385175  | 0.968677  |
| C  | 0.518710  | -1.165495 | 2.212106  |
| H  | 1.477477  | -1.608514 | 1.920376  |
| H  | -0.269751 | -1.915826 | 2.083486  |
| H  | 0.564060  | -0.867685 | 3.267819  |
| C  | 2.132695  | -1.798218 | -0.909375 |
| C  | 3.704854  | 0.218795  | -2.032469 |
| C  | 3.400482  | -2.098356 | -1.413026 |
| C  | 1.623554  | -0.492001 | -0.997244 |

|   |          |           |           |
|---|----------|-----------|-----------|
| C | 2.438874 | 0.521078  | -1.528671 |
| C | 4.186196 | -1.090798 | -1.974665 |
| H | 3.778289 | -3.121513 | -1.359020 |
| H | 2.083053 | 1.554910  | -1.565216 |
| H | 5.181044 | -1.324011 | -2.358270 |
| H | 4.321699 | 1.010409  | -2.462976 |
| H | 1.533916 | -2.597575 | -0.462528 |

[Ni(Ph)(H<sub>2</sub>O)(DMPE)]<sup>+</sup>

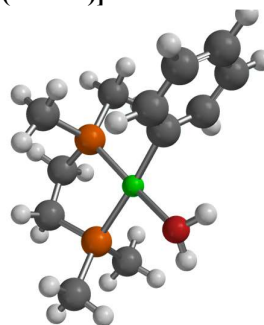

39

|    |           |           |           |
|----|-----------|-----------|-----------|
| Ni | -0.254402 | -0.112793 | -0.701729 |
| P  | -2.418381 | 0.284936  | -0.226533 |
| P  | 0.190693  | 0.202596  | 1.357452  |
| C  | -2.550316 | 0.288604  | 1.608450  |
| H  | -2.643436 | -0.759154 | 1.929234  |
| H  | -3.461794 | 0.807928  | 1.934209  |
| C  | -1.293896 | 0.920862  | 2.182969  |
| H  | -1.215781 | 0.789477  | 3.271415  |
| H  | -1.273562 | 2.003184  | 1.987909  |
| C  | -3.003157 | 1.937900  | -0.723616 |
| H  | -2.348102 | 2.710435  | -0.303719 |
| H  | -4.029835 | 2.109381  | -0.374257 |
| H  | -2.979582 | 2.029398  | -1.816297 |
| C  | -3.721960 | -0.839038 | -0.810567 |
| H  | -3.501916 | -1.863884 | -0.490436 |
| H  | -3.760746 | -0.820877 | -1.906681 |
| H  | -4.703036 | -0.540302 | -0.419206 |
| C  | 1.561907  | 1.277239  | 1.858385  |
| H  | 2.516681  | 0.807427  | 1.597160  |
| H  | 1.523157  | 1.441588  | 2.942782  |
| H  | 1.493368  | 2.243427  | 1.345519  |
| C  | 0.490336  | -1.361863 | 2.232557  |
| H  | 1.405078  | -1.829918 | 1.851083  |
| H  | -0.346186 | -2.052701 | 2.075551  |
| H  | 0.604524  | -1.173621 | 3.308025  |
| C  | 2.180417  | -1.673905 | -0.893286 |
| C  | 3.797297  | 0.452939  | -1.677009 |
| C  | 3.513753  | -1.902302 | -1.246090 |
| C  | 1.629886  | -0.383296 | -0.930623 |
| C  | 2.465338  | 0.676013  | -1.319599 |

|   |           |           |           |
|---|-----------|-----------|-----------|
| C | 4.326760  | -0.838171 | -1.637957 |
| H | 3.918086  | -2.916698 | -1.213311 |
| H | 2.078282  | 1.699606  | -1.344134 |
| H | 5.369303  | -1.013581 | -1.909840 |
| H | 4.426168  | 1.292864  | -1.981571 |
| H | 1.563164  | -2.525470 | -0.589728 |
| O | -0.544078 | -0.596118 | -2.629908 |
| H | 0.246748  | -0.574707 | -3.184026 |
| H | -1.250781 | -0.197404 | -3.152580 |

TS3-Ni

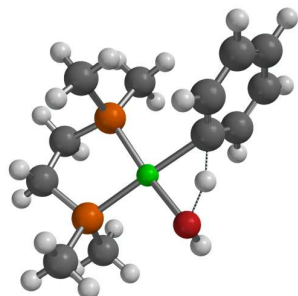

39

|    |           |           |           |
|----|-----------|-----------|-----------|
| Ni | -0.420152 | -0.161478 | -0.811024 |
| P  | -2.469501 | 0.292551  | -0.152937 |
| P  | 0.175263  | 0.122283  | 1.255363  |
| C  | -2.517845 | 0.350807  | 1.680323  |
| H  | -2.654792 | -0.679966 | 2.036428  |
| H  | -3.382544 | 0.930515  | 2.029294  |
| C  | -1.198516 | 0.926237  | 2.172217  |
| H  | -1.060338 | 0.796229  | 3.254157  |
| H  | -1.138175 | 2.004429  | 1.966328  |
| C  | -2.992778 | 1.940377  | -0.709673 |
| H  | -2.305881 | 2.702882  | -0.324574 |
| H  | -4.008648 | 2.156708  | -0.354049 |
| H  | -2.980098 | 1.983576  | -1.805046 |
| C  | -3.771590 | -0.840714 | -0.695906 |
| H  | -3.558830 | -1.853350 | -0.335808 |
| H  | -3.804147 | -0.857628 | -1.791187 |
| H  | -4.747640 | -0.515621 | -0.313582 |
| C  | 1.667440  | 1.078370  | 1.623560  |
| H  | 2.546007  | 0.549724  | 1.236284  |
| H  | 1.771807  | 1.201697  | 2.708987  |
| H  | 1.610692  | 2.064512  | 1.149396  |
| C  | 0.422492  | -1.477237 | 2.078357  |
| H  | 1.263768  | -2.004729 | 1.614442  |
| H  | -0.474859 | -2.098762 | 1.980908  |
| H  | 0.640230  | -1.320123 | 3.142664  |
| C  | 2.142113  | -1.676345 | -1.085197 |
| C  | 3.717052  | 0.571504  | -1.590338 |
| C  | 3.526539  | -1.758017 | -0.952776 |

|   |           |           |           |
|---|-----------|-----------|-----------|
| C | 1.513772  | -0.469280 | -1.452141 |
| C | 2.331466  | 0.649222  | -1.710252 |
| C | 4.313774  | -0.630922 | -1.202619 |
| H | 3.996086  | -2.699062 | -0.661769 |
| H | 1.874563  | 1.594672  | -2.015631 |
| H | 5.398587  | -0.691648 | -1.100649 |
| H | 4.335176  | 1.446518  | -1.798325 |
| H | 1.535796  | -2.567039 | -0.898327 |
| O | -0.782477 | -0.635965 | -2.678720 |
| H | 0.449424  | -0.579824 | -2.284457 |
| H | -0.963237 | 0.154897  | -3.203722 |

[Ni(OH)(Ph-H)(DMPE)]<sup>+</sup>

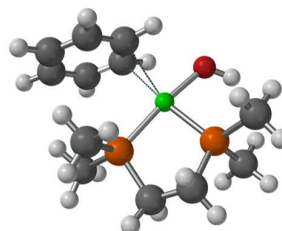

39

|    |           |           |           |
|----|-----------|-----------|-----------|
| Ni | -0.231162 | 0.125187  | -0.969899 |
| P  | -2.249095 | 0.445908  | -0.253384 |
| P  | 0.411373  | 0.200644  | 1.160614  |
| C  | -2.291941 | 0.318195  | 1.572065  |
| H  | -2.380661 | -0.747654 | 1.825708  |
| H  | -3.186484 | 0.821786  | 1.963088  |
| C  | -1.001534 | 0.907025  | 2.106015  |
| H  | -0.863408 | 0.716158  | 3.178938  |
| H  | -0.975961 | 1.997373  | 1.965644  |
| C  | -2.862926 | 2.108932  | -0.635856 |
| H  | -2.220187 | 2.862638  | -0.166968 |
| H  | -3.885948 | 2.217653  | -0.251865 |
| H  | -2.867554 | 2.281095  | -1.717951 |
| C  | -3.489214 | -0.709158 | -0.884345 |
| H  | -3.183638 | -1.738269 | -0.665138 |
| H  | -3.599208 | -0.596608 | -1.968076 |
| H  | -4.454473 | -0.507066 | -0.401395 |
| C  | 1.809720  | 1.231181  | 1.695266  |
| H  | 2.765048  | 0.763146  | 1.442276  |
| H  | 1.757048  | 1.361391  | 2.784044  |
| H  | 1.758251  | 2.214268  | 1.213515  |
| C  | 0.682154  | -1.410131 | 1.962812  |
| H  | 1.586103  | -1.886758 | 1.571110  |
| H  | -0.167997 | -2.075131 | 1.769892  |
| H  | 0.792229  | -1.270144 | 3.045996  |
| C  | 2.108642  | -2.182849 | -1.202698 |
| C  | 3.035787  | 0.453474  | -1.379513 |
| C  | 3.264306  | -1.801076 | -0.533206 |



|   |           |           |           |
|---|-----------|-----------|-----------|
| C | 1.408364  | -1.251079 | -1.984119 |
| C | 1.872012  | 0.077883  | -2.070032 |
| C | 3.730468  | -0.482545 | -0.624864 |
| H | 3.815339  | -2.530310 | 0.063092  |
| H | 1.392176  | 0.777112  | -2.754767 |
| H | 4.641621  | -0.191678 | -0.099433 |
| H | 3.400864  | 1.478845  | -1.455622 |
| H | 1.753425  | -3.212660 | -1.143377 |
| O | -0.897537 | 0.191536  | -2.704241 |
| H | 0.570038  | -1.574527 | -2.600295 |
| H | -1.746040 | 0.616214  | -2.853032 |

**Cis-5a'**

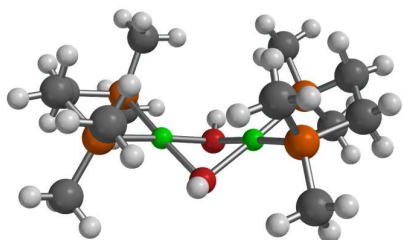

54

|    |           |           |           |
|----|-----------|-----------|-----------|
| Ni | -0.005464 | 0.796250  | 1.324025  |
| P  | -1.497596 | 0.073199  | 2.726462  |
| P  | 1.489903  | 0.091320  | 2.729216  |
| C  | -0.675707 | -0.918513 | 4.034238  |
| H  | -0.568792 | -1.940944 | 3.644713  |
| H  | -1.313772 | -0.977691 | 4.926107  |
| C  | 0.680919  | -0.300872 | 4.326785  |
| H  | 1.321522  | -0.955758 | 4.932455  |
| H  | 0.574895  | 0.646333  | 4.874772  |
| C  | -2.343373 | 1.433972  | 3.576722  |
| H  | -1.618729 | 2.042919  | 4.129198  |
| H  | -3.089140 | 1.034742  | 4.276574  |
| H  | -2.844982 | 2.073686  | 2.841097  |
| C  | -2.814808 | -0.974383 | 2.054403  |
| H  | -2.379199 | -1.834270 | 1.533184  |
| H  | -3.435989 | -0.406120 | 1.352471  |
| H  | -3.453091 | -1.333322 | 2.872181  |
| C  | 2.858845  | 1.216513  | 3.097735  |
| H  | 3.441281  | 1.412068  | 2.190201  |
| H  | 3.518111  | 0.766319  | 3.851234  |
| H  | 2.469241  | 2.166832  | 3.479050  |
| C  | 2.261061  | -1.449193 | 2.158742  |
| H  | 2.797029  | -1.265178 | 1.220624  |
| H  | 1.494106  | -2.210929 | 1.976218  |
| H  | 2.970794  | -1.820675 | 2.909353  |
| O  | -1.221644 | 1.475150  | -0.004123 |
| H  | -2.133653 | 1.168450  | -0.010183 |
| O  | 1.219881  | 1.475766  | 0.003792  |

|    |           |           |           |
|----|-----------|-----------|-----------|
| H  | 2.132082  | 1.169639  | 0.009979  |
| Ni | 0.004108  | 0.795771  | -1.324133 |
| P  | -1.490163 | 0.090683  | -2.730405 |
| P  | 1.497310  | 0.072550  | -2.725365 |
| C  | 2.812390  | -0.976876 | -2.051978 |
| H  | 3.452233  | -1.335141 | -2.868836 |
| H  | 2.374978  | -1.837186 | -1.532953 |
| H  | 3.432394  | -0.410100 | -1.347796 |
| C  | 2.345683  | 1.433160  | -3.573270 |
| H  | 3.092133  | 1.033754  | -4.272294 |
| H  | 2.846766  | 2.071861  | -2.836408 |
| H  | 1.622419  | 2.043162  | -4.126386 |
| C  | 0.676308  | -0.917366 | -4.035061 |
| H  | 1.315102  | -0.975618 | -4.926464 |
| H  | 0.568817  | -1.940240 | -3.646859 |
| C  | -2.260067 | -1.451370 | -2.162422 |
| H  | -1.492402 | -2.212390 | -1.979901 |
| H  | -2.968524 | -1.822867 | -2.914229 |
| H  | -2.797303 | -1.269071 | -1.224716 |
| C  | -0.679952 | -0.299068 | -4.327933 |
| H  | -0.573317 | 0.648944  | -4.874401 |
| H  | -1.320120 | -0.952991 | -4.935108 |
| C  | -2.859976 | 1.214990  | -3.098353 |
| H  | -3.518472 | 0.765012  | -3.852651 |
| H  | -2.471065 | 2.166086  | -3.478436 |
| H  | -3.443009 | 1.409000  | -2.190871 |

**Trans-5a'**

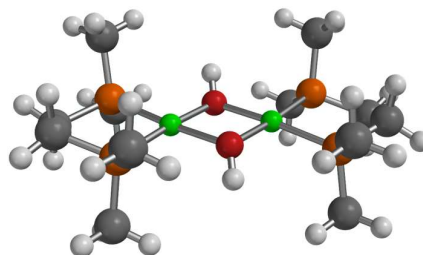

54

|   |           |           |           |
|---|-----------|-----------|-----------|
| H | 1.901327  | 3.373530  | 1.094023  |
| H | -1.941848 | 3.363304  | 1.054483  |
| H | -0.004802 | 2.048810  | -0.405584 |
| O | -0.005922 | 1.260136  | 0.146203  |
| C | 4.637696  | -0.651033 | -0.331114 |
| C | 4.629389  | 0.687116  | 0.390084  |
| C | 2.815220  | 2.805869  | 1.302535  |
| C | 3.201322  | 2.354112  | -1.526089 |
| C | 3.204547  | -2.324451 | 1.575315  |
| C | 2.850356  | -2.786981 | -1.255652 |
| H | 4.727037  | -0.513846 | -1.418182 |

|    |           |           |           |
|----|-----------|-----------|-----------|
| H  | 5.469803  | -1.294874 | -0.016135 |
| H  | 4.710414  | 0.550583  | 1.477890  |
| H  | 5.459137  | 1.337442  | 0.082338  |
| H  | 4.006913  | 3.097634  | -1.464810 |
| H  | 4.016602  | -3.061674 | 1.523996  |
| Ni | 1.450233  | 0.005707  | 0.012573  |
| P  | 3.017180  | 1.501204  | 0.065383  |
| P  | 3.029246  | -1.477355 | -0.020247 |
| C  | -4.638195 | 0.651030  | 0.329163  |
| C  | -4.628863 | -0.687214 | -0.391846 |
| C  | -2.812916 | -2.805339 | -1.302307 |
| C  | -3.203437 | -2.354712 | 1.525889  |
| C  | -3.202390 | 2.323334  | -1.576193 |
| C  | -2.852697 | 2.787924  | 1.254984  |
| H  | -4.728920 | 0.513994  | 1.416135  |
| H  | -5.469932 | 1.294780  | 0.013015  |
| H  | -4.708505 | -0.550824 | -1.479771 |
| H  | -5.458964 | -1.337553 | -0.085090 |
| H  | -4.008833 | -3.098319 | 1.463091  |
| H  | -4.014567 | 3.060544  | -1.526618 |
| Ni | -1.450249 | -0.005584 | -0.008932 |
| P  | -3.017003 | -1.501175 | -0.064982 |
| P  | -3.029414 | 1.477385  | 0.020229  |
| H  | -1.899160 | -3.372789 | -1.092640 |
| H  | 1.939593  | -3.362163 | -1.054207 |
| H  | 0.004760  | -2.047093 | 0.415504  |
| O  | 0.005882  | -1.260506 | -0.139253 |
| H  | -2.778451 | 2.348851  | 2.256074  |
| H  | -3.717908 | 3.462256  | 1.216639  |
| H  | -3.440076 | -1.632354 | 2.315584  |
| H  | -2.267732 | -2.862329 | 1.788360  |
| H  | 3.426216  | -1.597860 | 2.365464  |
| H  | 2.270038  | -2.838839 | 1.828710  |
| H  | 3.715408  | -3.461610 | -1.219015 |
| H  | 2.774814  | -2.347185 | -2.256329 |
| H  | 3.436641  | 1.631423  | -2.315875 |
| H  | 2.265273  | 2.861736  | -1.787319 |
| H  | 3.674547  | 3.488236  | 1.275812  |
| H  | 2.734165  | 2.362720  | 2.301306  |
| H  | -2.267522 | 2.837580  | -1.828549 |
| H  | -3.422818 | 1.596176  | -2.366168 |
| H  | -2.730534 | -2.361811 | -2.300803 |
| H  | -3.672100 | -3.487942 | -1.277071 |

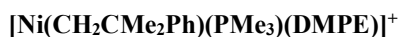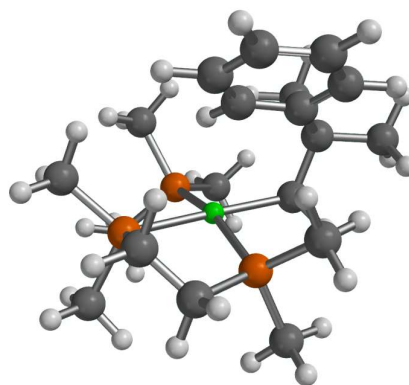

61

|    |           |           |           |
|----|-----------|-----------|-----------|
| Ni | -0.078611 | -0.676721 | 0.290054  |
| P  | 2.130653  | -0.614505 | 0.384853  |
| P  | 0.015884  | -0.132083 | 2.475232  |
| C  | 2.697505  | -0.051361 | 2.054579  |
| H  | 3.644670  | 0.496036  | 1.965731  |
| H  | 2.899980  | -0.940761 | 2.667239  |
| C  | 1.596730  | 0.791324  | 2.674793  |
| H  | 1.491329  | 1.750586  | 2.146418  |
| H  | 1.782482  | 1.014540  | 3.734959  |
| C  | 2.905539  | -2.244483 | 0.153566  |
| H  | 2.486373  | -2.961686 | 0.868876  |
| H  | 3.991120  | -2.179256 | 0.303242  |
| H  | 2.710232  | -2.611097 | -0.860917 |
| C  | 3.061158  | 0.469262  | -0.741063 |
| H  | 2.817325  | 1.516667  | -0.526684 |
| H  | 2.811846  | 0.259627  | -1.786828 |
| H  | 4.137073  | 0.312793  | -0.592043 |
| C  | 0.243817  | -1.502961 | 3.663083  |
| H  | -0.700931 | -2.024676 | 3.842541  |
| H  | 0.616235  | -1.115506 | 4.620434  |
| H  | 0.960766  | -2.232912 | 3.269461  |
| C  | -1.221945 | 0.931498  | 3.285644  |
| H  | -1.410309 | 1.823996  | 2.677598  |
| H  | -0.863783 | 1.242735  | 4.275131  |
| H  | -2.167988 | 0.392708  | 3.414426  |
| C  | 0.135096  | -0.968349 | -1.693913 |
| H  | -0.500310 | -1.805371 | -2.018943 |
| H  | 1.160119  | -1.295818 | -1.924066 |
| C  | -0.179635 | 0.258638  | -2.592113 |
| C  | 0.248382  | 1.574640  | -1.940363 |
| C  | 0.989533  | 3.977868  | -0.640645 |
| C  | -0.275368 | 1.920842  | -0.684026 |
| C  | 1.118607  | 2.486755  | -2.545090 |
| C  | 1.488266  | 3.672824  | -1.904814 |



|   |           |           |           |
|---|-----------|-----------|-----------|
| C | 0.092437  | 3.096135  | -0.034326 |
| H | -1.023409 | 1.267203  | -0.216777 |
| H | 2.179343  | 4.357568  | -2.399852 |
| H | -0.330743 | 3.330656  | 0.944121  |
| H | 1.282718  | 4.899878  | -0.136448 |
| C | -1.683125 | 0.355401  | -2.871118 |
| H | -2.271276 | 0.435078  | -1.949920 |
| H | -2.031565 | -0.527816 | -3.422838 |
| H | -1.913096 | 1.239567  | -3.480624 |
| C | 0.519088  | 0.040372  | -3.935719 |
| H | 0.210457  | -0.923523 | -4.359495 |
| H | 1.612344  | 0.019676  | -3.833090 |
| H | 0.262020  | 0.819086  | -4.667695 |
| H | 1.539945  | 2.270646  | -3.527139 |
| P | -2.199670 | -1.400767 | 0.338939  |
| C | -2.557300 | -2.467269 | 1.781758  |
| H | -3.546534 | -2.929346 | 1.670149  |
| H | -2.563396 | -1.872116 | 2.701862  |
| H | -1.803906 | -3.257535 | 1.878440  |
| C | -2.808250 | -2.456480 | -1.018892 |
| H | -3.827878 | -2.794863 | -0.796103 |
| H | -2.813663 | -1.916881 | -1.970230 |
| H | -2.158774 | -3.333761 | -1.124690 |
| C | -3.519819 | -0.144761 | 0.500621  |
| H | -3.567472 | 0.495133  | -0.386979 |
| H | -3.326750 | 0.496553  | 1.368026  |
| H | -4.493566 | -0.633628 | 0.631670  |

IV'

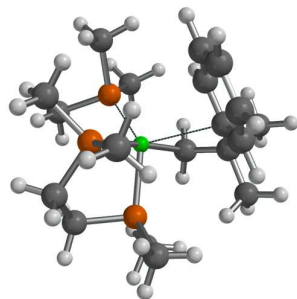

61

|    |           |           |           |
|----|-----------|-----------|-----------|
| Ni | -0.058517 | -0.446326 | 0.046757  |
| P  | 2.108273  | -0.940403 | -0.042220 |
| P  | 0.486914  | 0.390046  | 2.093241  |
| C  | 2.352672  | -1.648458 | 1.641280  |
| H  | 3.398089  | -1.960000 | 1.779766  |
| H  | 1.735881  | -2.556424 | 1.686856  |
| C  | 1.910608  | -0.645498 | 2.699361  |
| H  | 2.731568  | 0.031080  | 2.973429  |
| H  | 1.604847  | -1.152272 | 3.623584  |
| C  | 2.649426  | -2.285332 | -1.143278 |

|   |           |           |           |
|---|-----------|-----------|-----------|
| H | 1.959024  | -3.132412 | -1.054653 |
| H | 3.660761  | -2.612842 | -0.871870 |
| H | 2.654384  | -1.953210 | -2.187765 |
| C | 3.496949  | 0.250970  | -0.139219 |
| H | 3.448574  | 0.958158  | 0.696433  |
| H | 3.474666  | 0.827942  | -1.069710 |
| H | 4.451564  | -0.287735 | -0.079862 |
| C | -0.588302 | 0.523505  | 3.567030  |
| H | -1.348336 | 1.296235  | 3.400976  |
| H | 0.020353  | 0.821142  | 4.430431  |
| H | -1.089492 | -0.421210 | 3.802922  |
| C | 1.152765  | 2.090694  | 2.055775  |
| H | 1.806745  | 2.250674  | 1.193085  |
| H | 1.707796  | 2.298530  | 2.979709  |
| H | 0.321407  | 2.799379  | 1.977212  |
| C | -0.347015 | -0.982307 | -1.850602 |
| H | -1.374175 | -1.333944 | -1.985779 |
| H | 0.310447  | -1.786009 | -2.206714 |
| C | -0.139080 | 0.315561  | -2.656649 |
| C | -0.419055 | 1.503623  | -1.730693 |
| C | -1.123383 | 3.724742  | -0.130366 |
| C | -1.654892 | 1.558105  | -1.056767 |
| C | 0.457732  | 2.585954  | -1.568872 |
| C | 0.107276  | 3.685515  | -0.785300 |
| C | -2.002854 | 2.650606  | -0.263106 |
| H | 0.806870  | 4.517226  | -0.682657 |
| H | -2.972485 | 2.669782  | 0.238054  |
| H | -1.394966 | 4.586321  | 0.481787  |
| C | -1.144694 | 0.358480  | -3.817328 |
| H | -2.180384 | 0.316097  | -3.456487 |
| H | -0.989677 | -0.498931 | -4.487009 |
| H | -1.029427 | 1.276545  | -4.411447 |
| C | 1.260204  | 0.369718  | -3.253761 |
| H | 1.427303  | -0.507344 | -3.891103 |
| H | 2.045537  | 0.382949  | -2.490743 |
| H | 1.402460  | 1.260693  | -3.879422 |
| H | 1.425487  | 2.582873  | -2.072007 |
| P | -1.946367 | -1.436489 | 0.710675  |
| C | -1.543819 | -2.723238 | 1.946994  |
| H | -2.455917 | -3.183053 | 2.349788  |
| H | -0.956669 | -2.314517 | 2.776828  |
| H | -0.940877 | -3.501897 | 1.463990  |
| C | -2.947326 | -2.393718 | -0.478753 |
| H | -3.765747 | -2.898748 | 0.049258  |
| H | -3.379806 | -1.729624 | -1.237426 |
| H | -2.332164 | -3.145715 | -0.986117 |
| C | -3.257856 | -0.446489 | 1.511856  |
| H | -3.739838 | 0.184375  | 0.755199  |
| H | -2.857939 | 0.207841  | 2.290610  |
| H | -4.019091 | -1.103712 | 1.952059  |

|   |           |          |           |
|---|-----------|----------|-----------|
| H | -2.376431 | 0.752498 | -1.207259 |
|---|-----------|----------|-----------|

TS4

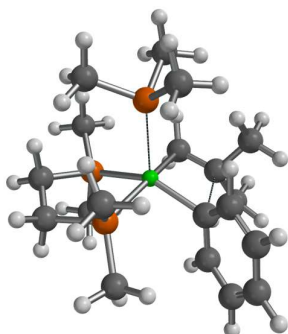

61

|    |           |           |           |
|----|-----------|-----------|-----------|
| Ni | 0.350220  | -0.116466 | -0.290616 |
| P  | 2.006440  | -1.471328 | 0.154235  |
| P  | 0.728185  | 0.734539  | 1.753633  |
| C  | 2.157065  | -1.650834 | 1.980062  |
| H  | 3.109353  | -2.133941 | 2.241479  |
| H  | 1.355172  | -2.330153 | 2.298501  |
| C  | 2.009194  | -0.285705 | 2.626973  |
| H  | 2.950331  | 0.276113  | 2.545526  |
| H  | 1.776872  | -0.352537 | 3.698266  |
| C  | 2.026304  | -3.180530 | -0.468228 |
| H  | 1.121048  | -3.712020 | -0.152511 |
| H  | 2.904426  | -3.717786 | -0.088171 |
| H  | 2.062361  | -3.180187 | -1.563790 |
| C  | 3.624746  | -0.812245 | -0.368969 |
| H  | 3.786803  | 0.176193  | 0.078093  |
| H  | 3.640820  | -0.696308 | -1.459520 |
| H  | 4.442322  | -1.481892 | -0.070284 |
| C  | -0.714642 | 0.788709  | 2.870973  |
| H  | -1.504890 | 1.386124  | 2.398349  |
| H  | -0.443910 | 1.254739  | 3.826977  |
| H  | -1.106153 | -0.213979 | 3.066859  |
| C  | 1.382273  | 2.421203  | 1.973426  |
| H  | 2.237142  | 2.597927  | 1.310448  |
| H  | 1.702806  | 2.548088  | 3.015655  |
| H  | 0.605329  | 3.159723  | 1.748251  |
| C  | 0.405717  | -0.880762 | -2.109367 |
| H  | -0.183676 | -1.799215 | -2.141860 |
| H  | 1.409376  | -1.001124 | -2.527233 |
| C  | -0.257011 | 0.362205  | -2.418744 |
| C  | -0.356736 | 1.709970  | -0.853678 |
| C  | -1.033047 | 4.419416  | -0.380345 |
| C  | -1.651358 | 2.080491  | -0.452308 |
| C  | 0.584008  | 2.741089  | -1.021127 |
| C  | 0.254915  | 4.075161  | -0.793751 |
| C  | -1.983299 | 3.411840  | -0.202877 |

|   |           |           |           |
|---|-----------|-----------|-----------|
| H | 1.013022  | 4.849305  | -0.930866 |
| H | -2.994825 | 3.662492  | 0.123672  |
| H | -1.296206 | 5.463500  | -0.203016 |
| C | -1.728339 | 0.265777  | -2.736260 |
| H | -2.298644 | -0.237474 | -1.949215 |
| H | -1.845449 | -0.322145 | -3.658064 |
| H | -2.179783 | 1.249906  | -2.904771 |
| C | 0.497288  | 1.226056  | -3.401022 |
| H | 0.432041  | 0.733857  | -4.382649 |
| H | 1.561036  | 1.309048  | -3.152994 |
| H | 0.074268  | 2.231861  | -3.500518 |
| H | 1.602852  | 2.497133  | -1.331376 |
| P | -1.652130 | -1.621653 | 0.409233  |
| C | -1.330002 | -2.758059 | 1.821664  |
| H | -2.216013 | -3.369724 | 2.038959  |
| H | -1.049165 | -2.219591 | 2.733842  |
| H | -0.505155 | -3.434355 | 1.564831  |
| C | -2.111573 | -2.895419 | -0.835890 |
| H | -2.899459 | -3.552772 | -0.445245 |
| H | -2.470971 | -2.437608 | -1.765189 |
| H | -1.237087 | -3.511600 | -1.080226 |
| C | -3.323305 | -0.995288 | 0.854878  |
| H | -3.785360 | -0.512641 | -0.016138 |
| H | -3.258870 | -0.249367 | 1.656225  |
| H | -3.979552 | -1.812474 | 1.183850  |
| H | -2.417128 | 1.314721  | -0.318041 |

13'

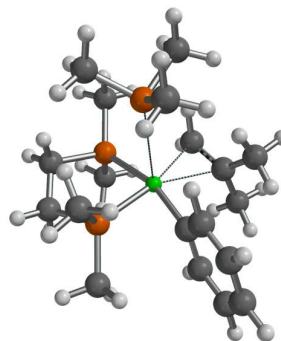

61

|    |          |           |           |
|----|----------|-----------|-----------|
| Ni | 0.588196 | 0.160095  | -0.376808 |
| P  | 1.990150 | -1.505725 | 0.152133  |
| P  | 0.981609 | 0.883989  | 1.656426  |
| C  | 2.190095 | -1.559724 | 1.977181  |
| H  | 3.060283 | -2.169671 | 2.256120  |
| H  | 1.297341 | -2.053711 | 2.388322  |
| C  | 2.296377 | -0.130066 | 2.466704  |
| H  | 3.265343 | 0.310522  | 2.192721  |
| H  | 2.202477 | -0.043525 | 3.557914  |

|   |           |           |           |
|---|-----------|-----------|-----------|
| C | 1.718324  | -3.237598 | -0.329217 |
| H | 0.745705  | -3.587087 | 0.034460  |
| H | 2.503253  | -3.872695 | 0.099710  |
| H | 1.741434  | -3.342850 | -1.419549 |
| C | 3.671928  | -1.153946 | -0.458359 |
| H | 3.989451  | -0.154985 | -0.137322 |
| H | 3.684092  | -1.175475 | -1.554622 |
| H | 4.386952  | -1.897603 | -0.083039 |
| C | -0.441625 | 0.656754  | 2.769157  |
| H | -1.343348 | 1.107078  | 2.340497  |
| H | -0.227781 | 1.128811  | 3.736632  |
| H | -0.619696 | -0.411579 | 2.930793  |
| C | 1.513492  | 2.588120  | 1.997470  |
| H | 2.311600  | 2.890425  | 1.310208  |
| H | 1.887274  | 2.640542  | 3.027892  |
| H | 0.671806  | 3.279288  | 1.883595  |
| C | 0.546934  | -0.930907 | -2.205798 |
| H | -0.119217 | -1.768603 | -1.995393 |
| H | 1.569405  | -1.189716 | -2.485912 |
| C | 0.028724  | 0.274390  | -2.634880 |
| C | -0.310148 | 1.898466  | -0.459983 |
| C | -1.586441 | 4.424491  | -0.587038 |
| C | -1.656215 | 2.055101  | -0.098087 |
| C | 0.384208  | 3.048887  | -0.864123 |
| C | -0.242224 | 4.293315  | -0.940753 |
| C | -2.290717 | 3.297927  | -0.160635 |
| H | 0.325830  | 5.167124  | -1.268444 |
| H | -3.342523 | 3.382933  | 0.121819  |
| H | -2.079062 | 5.397183  | -0.639255 |
| C | -1.444947 | 0.455426  | -2.814241 |
| H | -2.028214 | -0.117316 | -2.083340 |
| H | -1.721338 | 0.098173  | -3.818540 |
| H | -1.745888 | 1.507341  | -2.752084 |
| C | 0.907606  | 1.235964  | -3.367750 |
| H | 0.840376  | 1.016152  | -4.444927 |
| H | 1.961346  | 1.146325  | -3.077425 |
| H | 0.588851  | 2.276304  | -3.241287 |
| H | 1.444240  | 2.978275  | -1.125150 |
| P | -1.758120 | -1.744125 | 0.478217  |
| C | -1.585151 | -2.927457 | 1.881912  |
| H | -2.454380 | -3.596537 | 1.949475  |
| H | -1.494768 | -2.388247 | 2.833188  |
| H | -0.684581 | -3.542824 | 1.763010  |
| C | -2.214990 | -2.932377 | -0.854068 |
| H | -3.050588 | -3.576814 | -0.548533 |
| H | -2.508161 | -2.392036 | -1.763509 |
| H | -1.360887 | -3.572962 | -1.109643 |
| C | -3.426320 | -1.065571 | 0.860353  |
| H | -3.802815 | -0.494066 | 0.001806  |
| H | -3.374575 | -0.385251 | 1.720478  |

|   |           |           |          |
|---|-----------|-----------|----------|
| H | -4.145300 | -1.864515 | 1.088267 |
| H | -2.234679 | 1.186160  | 0.223251 |

# TS5

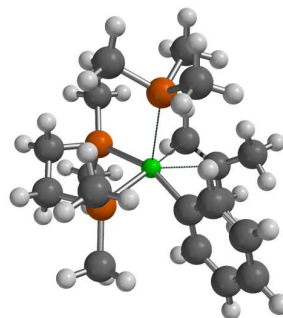

61

|    |           |           |           |
|----|-----------|-----------|-----------|
| Ni | 0.423242  | 0.054439  | -0.210237 |
| P  | 1.964903  | -1.521003 | 0.199591  |
| P  | 1.020585  | 0.881732  | 1.713971  |
| C  | 2.229197  | -1.593859 | 2.014782  |
| H  | 3.123418  | -2.183923 | 2.258571  |
| H  | 1.365634  | -2.108429 | 2.458499  |
| C  | 2.326404  | -0.164180 | 2.510538  |
| H  | 3.295174  | 0.275251  | 2.235156  |
| H  | 2.241623  | -0.085214 | 3.602750  |
| C  | 1.845327  | -3.257902 | -0.337050 |
| H  | 0.960391  | -3.740630 | 0.090976  |
| H  | 2.736236  | -3.814427 | -0.020284 |
| H  | 1.772756  | -3.310373 | -1.429527 |
| C  | 3.603653  | -1.024447 | -0.435190 |
| H  | 3.839040  | -0.000236 | -0.123476 |
| H  | 3.607552  | -1.050650 | -1.530988 |
| H  | 4.385519  | -1.702121 | -0.067796 |
| C  | -0.346560 | 0.851059  | 2.916959  |
| H  | -1.171147 | 1.478914  | 2.561522  |
| H  | 0.001173  | 1.229272  | 3.886798  |
| H  | -0.715468 | -0.171103 | 3.048661  |
| C  | 1.701325  | 2.555383  | 1.931548  |
| H  | 2.493675  | 2.748089  | 1.199162  |
| H  | 2.123331  | 2.635569  | 2.941531  |
| H  | 0.916264  | 3.308370  | 1.809446  |
| C  | 0.552949  | -0.863370 | -2.308017 |
| H  | -0.112389 | -1.704959 | -2.130688 |
| H  | 1.605862  | -1.098295 | -2.464287 |
| C  | 0.072237  | 0.324354  | -2.781340 |
| C  | -0.420640 | 1.825736  | -0.323642 |
| C  | -1.581872 | 4.395444  | -0.658438 |
| C  | -1.755886 | 2.078243  | 0.023493  |
| C  | 0.325171  | 2.914333  | -0.805644 |
| C  | -0.243616 | 4.175566  | -0.989191 |
| C  | -2.334020 | 3.339640  | -0.141898 |

|   |           |           |           |
|---|-----------|-----------|-----------|
| H | 0.366941  | 4.993276  | -1.378807 |
| H | -3.379252 | 3.495243  | 0.134089  |
| H | -2.029635 | 5.381987  | -0.791268 |
| C | -1.387472 | 0.574142  | -2.957613 |
| H | -2.002073 | -0.044211 | -2.293554 |
| H | -1.666552 | 0.338902  | -3.996508 |
| H | -1.645342 | 1.627700  | -2.795145 |
| C | 0.996285  | 1.309683  | -3.413104 |
| H | 0.987066  | 1.140625  | -4.501317 |
| H | 2.030831  | 1.195522  | -3.069838 |
| H | 0.674381  | 2.345716  | -3.262635 |
| H | 1.384246  | 2.778568  | -1.041284 |
| P | -1.625780 | -1.556229 | 0.331425  |
| C | -1.383791 | -2.681238 | 1.767833  |
| H | -2.228645 | -3.377074 | 1.859514  |
| H | -1.304440 | -2.116842 | 2.703709  |
| H | -0.467717 | -3.271552 | 1.654312  |
| C | -2.009453 | -2.816850 | -0.951900 |
| H | -2.799538 | -3.494954 | -0.603652 |
| H | -2.348773 | -2.337626 | -1.878782 |
| H | -1.121224 | -3.416323 | -1.187225 |
| C | -3.332503 | -0.982670 | 0.703051  |
| H | -3.738904 | -0.412394 | -0.141407 |
| H | -3.335388 | -0.332903 | 1.587212  |
| H | -3.994018 | -1.837372 | 0.898340  |
| H | -2.372650 | 1.277330  | 0.427006  |

**[Ni(Ph)(PMe<sub>3</sub>)(DMPE)]<sup>+</sup>**

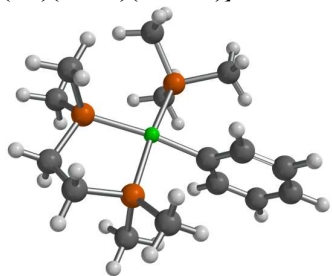

49

|    |           |          |           |
|----|-----------|----------|-----------|
| Ni | -0.124489 | 0.001258 | -0.121940 |
| P  | -2.250233 | 0.529668 | -0.582396 |
| P  | 0.337834  | 2.127193 | -0.409819 |
| C  | -2.374632 | 2.372068 | -0.632986 |
| H  | -2.521026 | 2.711533 | 0.402931  |
| H  | -3.268007 | 2.674348 | -1.196706 |
| C  | -1.098508 | 2.952350 | -1.214961 |
| H  | -1.037473 | 4.042362 | -1.089442 |
| H  | -1.027207 | 2.746789 | -2.293089 |
| C  | -2.788495 | 0.027299 | -2.250836 |
| H  | -2.090994 | 0.424001 | -2.998269 |
| H  | -3.795229 | 0.410477 | -2.462616 |

|   |           |           |           |
|---|-----------|-----------|-----------|
| H | -2.796042 | -1.064613 | -2.340190 |
| C | -3.638521 | 0.062544  | 0.500219  |
| H | -3.432421 | 0.394689  | 1.524552  |
| H | -3.784949 | -1.022851 | 0.513322  |
| H | -4.565499 | 0.535695  | 0.151881  |
| C | 1.791003  | 2.650904  | -1.360962 |
| H | 2.702883  | 2.363555  | -0.824692 |
| H | 1.779623  | 3.739798  | -1.495794 |
| H | 1.796864  | 2.165752  | -2.343771 |
| C | 0.515222  | 2.988825  | 1.183367  |
| H | 1.392161  | 2.600721  | 1.714594  |
| H | -0.369247 | 2.821389  | 1.809224  |
| H | 0.643018  | 4.066934  | 1.021498  |
| C | 2.228174  | -0.089401 | 1.575158  |
| C | 4.028526  | -0.751238 | -0.437257 |
| C | 3.576470  | -0.292097 | 1.883611  |
| C | 1.749994  | -0.220445 | 0.261464  |
| C | 2.680494  | -0.549124 | -0.737913 |
| C | 4.483508  | -0.626339 | 0.877308  |
| H | 3.917981  | -0.188845 | 2.916316  |
| H | 2.352145  | -0.655078 | -1.776772 |
| H | 5.537108  | -0.785645 | 1.114299  |
| H | 4.729225  | -1.009256 | -1.235093 |
| H | 1.538208  | 0.170398  | 2.384751  |
| P | -0.412113 | -2.154969 | 0.361635  |
| C | 1.024177  | -3.265184 | 0.209818  |
| H | 1.397939  | -3.260645 | -0.821003 |
| H | 0.734411  | -4.288191 | 0.481535  |
| H | 1.833640  | -2.930956 | 0.868413  |
| C | -1.697467 | -3.096987 | -0.528030 |
| H | -1.461356 | -3.128768 | -1.598469 |
| H | -2.683509 | -2.636563 | -0.405270 |
| H | -1.744121 | -4.125501 | -0.147745 |
| C | -0.882349 | -2.334187 | 2.113557  |
| H | -0.104095 | -1.895032 | 2.749437  |
| H | -0.996005 | -3.394586 | 2.374881  |
| H | -1.826618 | -1.814049 | 2.312254  |

**6'**

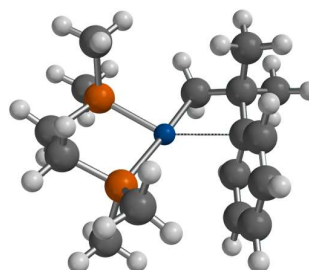

48

|    |           |          |           |
|----|-----------|----------|-----------|
| Pd | -0.262932 | 0.295476 | -0.124545 |
|----|-----------|----------|-----------|

|   |           |           |           |
|---|-----------|-----------|-----------|
| P | -1.517762 | 0.968774  | 1.621674  |
| P | -1.230249 | -1.879080 | 0.214666  |
| C | -2.718109 | -0.369127 | 2.013046  |
| H | -3.564343 | -0.246634 | 1.321040  |
| H | -3.113143 | -0.217948 | 3.027872  |
| C | -2.076538 | -1.737498 | 1.850450  |
| H | -2.816050 | -2.542477 | 1.965390  |
| H | -1.307857 | -1.900574 | 2.620451  |
| C | -0.297209 | -3.436204 | 0.354285  |
| H | 0.098174  | -3.723949 | -0.626450 |
| H | -0.948431 | -4.241034 | 0.720235  |
| H | 0.545520  | -3.311099 | 1.044178  |
| C | -2.581558 | -2.297776 | -0.936289 |
| H | -2.172084 | -2.462435 | -1.940356 |
| H | -3.298793 | -1.470304 | -0.994010 |
| H | -3.107177 | -3.205689 | -0.611767 |
| C | -0.532723 | 1.197706  | 3.129892  |
| H | 0.193920  | 2.004164  | 2.976608  |
| H | 0.015139  | 0.278742  | 3.367962  |
| H | -1.186869 | 1.457182  | 3.972803  |
| C | -2.498951 | 2.483409  | 1.469928  |
| H | -3.169773 | 2.411992  | 0.606665  |
| H | -1.833792 | 3.343032  | 1.329785  |
| H | -3.093923 | 2.638469  | 2.379571  |
| C | 0.550284  | 2.204712  | -0.347266 |
| H | 0.559360  | 2.840424  | 0.546131  |
| H | -0.031811 | 2.699727  | -1.138656 |
| C | 0.771485  | 0.190409  | -2.409149 |
| C | 2.306345  | -1.993270 | -1.625097 |
| C | 0.578675  | -1.057684 | -3.017334 |
| C | 1.751223  | 0.370815  | -1.401596 |
| C | 2.495982  | -0.760511 | -1.009238 |
| C | 1.350886  | -2.147600 | -2.633610 |
| H | -0.173328 | -1.161501 | -3.800953 |
| H | 3.247404  | -0.668360 | -0.225275 |
| H | 1.205886  | -3.119041 | -3.108478 |
| H | 2.907460  | -2.847693 | -1.309668 |
| C | 1.951211  | 1.775842  | -0.800002 |
| C | 2.885526  | 1.740530  | 0.403626  |
| H | 2.507387  | 1.074514  | 1.192206  |
| H | 2.972718  | 2.746333  | 0.831964  |
| H | 3.897130  | 1.410467  | 0.134137  |
| C | 2.520976  | 2.717916  | -1.862446 |
| H | 3.513693  | 2.383817  | -2.196904 |
| H | 2.625219  | 3.732918  | -1.455677 |
| H | 1.868314  | 2.776595  | -2.742580 |
| H | 0.213489  | 1.053523  | -2.777214 |

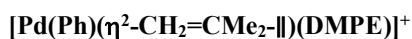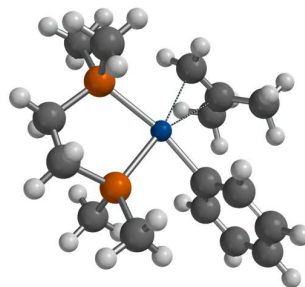

48

|    |           |           |           |
|----|-----------|-----------|-----------|
| Pd | -0.034650 | 0.385579  | 0.229374  |
| P  | -1.603512 | 0.985798  | 1.928894  |
| P  | -1.188724 | -1.583093 | 0.151685  |
| C  | -2.926596 | -0.293625 | 1.882089  |
| H  | -3.629116 | -0.006206 | 1.086366  |
| H  | -3.490891 | -0.286432 | 2.825003  |
| C  | -2.317189 | -1.654665 | 1.603803  |
| H  | -3.083163 | -2.422081 | 1.423002  |
| H  | -1.715163 | -2.000580 | 2.456764  |
| C  | -0.326441 | -3.175815 | 0.157618  |
| H  | 0.201640  | -3.317337 | -0.791921 |
| H  | -1.058559 | -3.982795 | 0.289837  |
| H  | 0.402459  | -3.211045 | 0.975227  |
| C  | -2.280387 | -1.653511 | -1.296384 |
| H  | -1.678710 | -1.659879 | -2.212380 |
| H  | -2.943594 | -0.781336 | -1.319022 |
| H  | -2.886377 | -2.568283 | -1.260254 |
| C  | -0.893196 | 0.827271  | 3.598052  |
| H  | -0.109691 | 1.580430  | 3.742435  |
| H  | -0.440584 | -0.163403 | 3.723217  |
| H  | -1.668048 | 0.967505  | 4.363159  |
| C  | -2.494390 | 2.568644  | 1.980834  |
| H  | -2.978569 | 2.764425  | 1.017233  |
| H  | -1.793930 | 3.384783  | 2.193128  |
| H  | -3.256929 | 2.549652  | 2.769887  |
| C  | 0.765254  | 2.531824  | 0.589261  |
| H  | 1.221862  | 2.452672  | 1.578535  |
| H  | -0.144600 | 3.128140  | 0.514918  |
| C  | 0.957723  | -0.670255 | -2.485981 |
| C  | 3.170033  | -2.004451 | -1.448565 |
| C  | 1.819677  | -1.366137 | -3.340260 |
| C  | 1.196202  | -0.620028 | -1.108313 |
| C  | 2.304870  | -1.311349 | -0.600497 |
| C  | 2.929611  | -2.034173 | -2.823944 |
| H  | 1.617613  | -1.386964 | -4.413613 |
| H  | 2.509868  | -1.308378 | 0.474264  |
| H  | 3.601742  | -2.579923 | -3.488645 |
| H  | 4.033632  | -2.528019 | -1.032032 |
| C  | 1.501790  | 2.275525  | -0.541430 |

|   |           |           |           |
|---|-----------|-----------|-----------|
| C | 2.934402  | 1.863339  | -0.466899 |
| H | 3.186991  | 1.377102  | 0.481647  |
| H | 3.554796  | 2.768635  | -0.555245 |
| H | 3.220268  | 1.204397  | -1.295557 |
| C | 1.008957  | 2.686458  | -1.888830 |
| H | 1.206158  | 1.914974  | -2.644617 |
| H | 1.564779  | 3.579418  | -2.214352 |
| H | -0.059058 | 2.930585  | -1.892692 |
| H | 0.091740  | -0.157394 | -2.914801 |

#### TS2-Pd

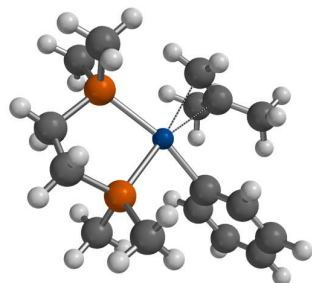

48

|    |           |           |           |
|----|-----------|-----------|-----------|
| Pd | 0.092293  | 0.258550  | 0.298533  |
| P  | -1.506441 | 0.942365  | 1.946864  |
| P  | -1.116599 | -1.668287 | 0.203104  |
| C  | -2.836157 | -0.333191 | 1.913606  |
| H  | -3.529192 | -0.054807 | 1.106233  |
| H  | -3.411014 | -0.307274 | 2.849680  |
| C  | -2.236283 | -1.705051 | 1.662457  |
| H  | -3.008510 | -2.471366 | 1.504130  |
| H  | -1.630438 | -2.034689 | 2.519255  |
| C  | -0.258618 | -3.262936 | 0.218973  |
| H  | 0.283752  | -3.399363 | -0.723622 |
| H  | -0.989920 | -4.072701 | 0.337714  |
| H  | 0.459707  | -3.298322 | 1.045822  |
| C  | -2.217120 | -1.745891 | -1.237783 |
| H  | -1.622120 | -1.775644 | -2.157461 |
| H  | -2.869355 | -0.865817 | -1.270784 |
| H  | -2.834318 | -2.652160 | -1.182655 |
| C  | -0.872170 | 0.887320  | 3.653314  |
| H  | -0.084527 | 1.639465  | 3.782120  |
| H  | -0.439023 | -0.098306 | 3.860846  |
| H  | -1.675979 | 1.085311  | 4.374472  |
| C  | -2.397759 | 2.526059  | 1.859663  |
| H  | -2.882434 | 2.630139  | 0.881897  |
| H  | -1.699329 | 3.361024  | 1.992038  |
| H  | -3.160432 | 2.581149  | 2.647086  |
| C  | 1.326913  | 2.200173  | 0.847182  |
| H  | 2.191892  | 1.816832  | 1.393361  |
| H  | 0.579976  | 2.738691  | 1.428590  |
| C  | 0.985551  | -0.726660 | -2.442796 |

|   |           |           |           |
|---|-----------|-----------|-----------|
| C | 3.329890  | -1.944198 | -1.564991 |
| C | 1.840016  | -1.342223 | -3.362374 |
| C | 1.295955  | -0.700747 | -1.077623 |
| C | 2.471304  | -1.331058 | -0.649266 |
| C | 3.016095  | -1.952462 | -2.925578 |
| H | 1.583568  | -1.343725 | -4.424263 |
| H | 2.736212  | -1.341861 | 0.412369  |
| H | 3.683784  | -2.435957 | -3.641054 |
| H | 4.247512  | -2.421227 | -1.212735 |
| C | 1.373016  | 2.332355  | -0.515508 |
| C | 2.611442  | 2.028364  | -1.288396 |
| H | 3.317621  | 1.406337  | -0.729931 |
| H | 3.106204  | 2.986733  | -1.509590 |
| H | 2.400004  | 1.556023  | -2.255490 |
| C | 0.274210  | 3.002251  | -1.273777 |
| H | -0.045708 | 2.384416  | -2.125735 |
| H | 0.640673  | 3.944312  | -1.708692 |
| H | -0.597615 | 3.224591  | -0.648759 |
| H | 0.073471  | -0.246544 | -2.810446 |

#### [Pd(Ph)( $\eta^2$ -CH<sub>2</sub>=CMe<sub>2</sub>-1)(DMPE)]<sup>+</sup>

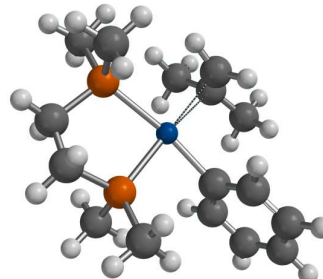

48

|    |           |           |           |
|----|-----------|-----------|-----------|
| Pd | 0.115795  | 0.230183  | 0.247284  |
| P  | -1.574199 | 1.033225  | 1.763272  |
| P  | -1.190633 | -1.630259 | 0.079782  |
| C  | -2.976298 | -0.152265 | 1.598465  |
| H  | -3.565433 | 0.162252  | 0.724504  |
| H  | -3.638351 | -0.077420 | 2.472502  |
| C  | -2.451925 | -1.565631 | 1.417505  |
| H  | -3.256781 | -2.277847 | 1.186243  |
| H  | -1.963010 | -1.926169 | 2.334308  |
| C  | -0.427748 | -3.267218 | 0.214265  |
| H  | 0.212034  | -3.446869 | -0.657510 |
| H  | -1.208516 | -4.037462 | 0.257057  |
| H  | 0.187697  | -3.323641 | 1.119237  |
| C  | -2.142988 | -1.680854 | -1.464093 |
| H  | -1.462666 | -1.772681 | -2.318153 |
| H  | -2.729862 | -0.762772 | -1.580960 |
| H  | -2.819968 | -2.545157 | -1.453585 |
| C  | -1.053439 | 0.845908  | 3.500523  |
| H  | -0.246052 | 1.553104  | 3.725085  |



|   |           |           |           |
|---|-----------|-----------|-----------|
| H | -0.673311 | -0.167475 | 3.675908  |
| H | -1.892678 | 1.037108  | 4.182229  |
| C | -2.372310 | 2.668787  | 1.738276  |
| H | -2.771491 | 2.882802  | 0.740044  |
| H | -1.641309 | 3.444162  | 1.997788  |
| H | -3.191080 | 2.703737  | 2.468543  |
| C | 1.587653  | 1.977303  | 0.822784  |
| H | 2.498743  | 1.439180  | 1.093485  |
| H | 1.019867  | 2.431483  | 1.635339  |
| C | 1.285453  | -0.939826 | -2.313797 |
| C | 3.499241  | -2.102187 | -1.089955 |
| C | 2.236689  | -1.613744 | -3.084886 |
| C | 1.433343  | -0.827209 | -0.926191 |
| C | 2.544187  | -1.430727 | -0.322069 |
| C | 3.347662  | -2.196658 | -2.474526 |
| H | 2.107020  | -1.682652 | -4.167354 |
| H | 2.682463  | -1.375599 | 0.761829  |
| H | 4.090734  | -2.725351 | -3.074350 |
| H | 4.365118  | -2.556193 | -0.602364 |
| C | 1.368941  | 2.351217  | -0.476034 |
| C | 2.354287  | 2.066957  | -1.557868 |
| H | 3.116881  | 1.339221  | -1.264145 |
| H | 2.858191  | 3.012008  | -1.811921 |
| H | 1.865682  | 1.722596  | -2.478719 |
| C | 0.228525  | 3.234895  | -0.861376 |
| H | -0.377045 | 2.773772  | -1.655692 |
| H | 0.613590  | 4.173151  | -1.287073 |
| H | -0.422010 | 3.480432  | -0.017162 |
| H | 0.429308  | -0.479617 | -2.816475 |

**[Pd(Ph)(DiPPE)]**

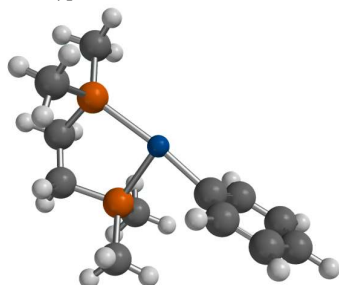

36

|    |           |           |           |
|----|-----------|-----------|-----------|
| Pd | -0.555061 | -0.879091 | 0.085420  |
| P  | 1.072327  | -1.854711 | 1.556709  |
| P  | 0.729103  | 0.940082  | -0.048025 |
| C  | 2.495262  | -0.697355 | 1.358033  |
| H  | 3.031783  | -0.997260 | 0.446040  |
| H  | 3.198362  | -0.815495 | 2.194274  |
| C  | 2.010534  | 0.738746  | 1.253166  |
| H  | 2.831943  | 1.436803  | 1.034428  |
| H  | 1.552573  | 1.073203  | 2.195605  |

|   |           |           |           |
|---|-----------|-----------|-----------|
| C | -0.012015 | 2.562549  | 0.234121  |
| H | -0.653641 | 2.830392  | -0.612237 |
| H | 0.788213  | 3.307568  | 0.335624  |
| H | -0.613469 | 2.551377  | 1.149865  |
| C | 1.608971  | 1.051484  | -1.624359 |
| H | 0.894318  | 1.220807  | -2.437411 |
| H | 2.158094  | 0.124078  | -1.821949 |
| H | 2.316453  | 1.890458  | -1.584134 |
| C | 0.686565  | -1.766447 | 3.334862  |
| H | -0.126981 | -2.460505 | 3.576254  |
| H | 0.360207  | -0.754187 | 3.601408  |
| H | 1.568754  | -2.028229 | 3.933989  |
| C | 1.805508  | -3.504924 | 1.347095  |
| H | 2.149014  | -3.636244 | 0.314776  |
| H | 1.056080  | -4.274581 | 1.564831  |
| H | 2.655695  | -3.636356 | 2.029359  |
| C | -1.731549 | -0.045918 | -2.539634 |
| C | -3.938013 | 1.269300  | -1.446925 |
| C | -2.756685 | 0.412924  | -3.371903 |
| C | -1.816175 | 0.127689  | -1.151839 |
| C | -2.913568 | 0.813693  | -0.613433 |
| C | -3.859759 | 1.070381  | -2.826363 |
| H | -2.687867 | 0.259818  | -4.451001 |
| H | -2.983649 | 0.994689  | 0.462998  |
| H | -4.655170 | 1.436813  | -3.477738 |
| H | -4.796385 | 1.788878  | -1.015709 |
| H | -0.869776 | -0.550428 | -2.986195 |

**[Pd((Ph)(H<sub>2</sub>O)(DMPE)]<sup>+</sup>**

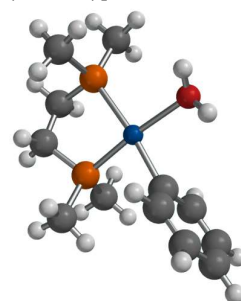

39

|    |           |           |           |
|----|-----------|-----------|-----------|
| Pd | 0.400883  | 0.691174  | 0.115159  |
| P  | -1.261429 | 1.584900  | 1.582981  |
| P  | -0.929630 | -1.088503 | -0.098227 |
| C  | -2.716804 | 0.481765  | 1.331288  |
| H  | -3.234802 | 0.831810  | 0.426393  |
| H  | -3.424712 | 0.586325  | 2.165298  |
| C  | -2.257769 | -0.957664 | 1.169354  |
| H  | -3.084693 | -1.627163 | 0.892468  |
| H  | -1.836795 | -1.344662 | 2.109067  |
| C  | -0.219603 | -2.740275 | 0.111361  |

|   |           |           |           |
|---|-----------|-----------|-----------|
| H | 0.453756  | -2.959894 | -0.724923 |
| H | -1.023637 | -3.487354 | 0.134348  |
| H | 0.350140  | -2.792671 | 1.045967  |
| C | -1.786205 | -1.141556 | -1.695613 |
| H | -1.053994 | -1.255451 | -2.503206 |
| H | -2.346047 | -0.213598 | -1.858789 |
| H | -2.480729 | -1.991689 | -1.717330 |
| C | -0.900018 | 1.434127  | 3.362576  |
| H | -0.061301 | 2.087536  | 3.630756  |
| H | -0.617206 | 0.402488  | 3.603394  |
| H | -1.776106 | 1.714899  | 3.962222  |
| C | -1.919949 | 3.270510  | 1.409678  |
| H | -2.248969 | 3.440405  | 0.378188  |
| H | -1.135343 | 3.999101  | 1.646650  |
| H | -2.767006 | 3.430834  | 2.089701  |
| C | 1.622866  | -0.115377 | -2.536372 |
| C | 3.778451  | -1.512433 | -1.457338 |
| C | 2.605445  | -0.646542 | -3.378072 |
| C | 1.707686  | -0.269068 | -1.145948 |
| C | 2.793977  | -0.982044 | -0.618612 |
| C | 3.684919  | -1.347741 | -2.840134 |
| H | 2.523824  | -0.512566 | -4.459203 |
| H | 2.882841  | -1.134430 | 0.461218  |
| H | 4.450009  | -1.766647 | -3.496405 |
| H | 4.619710  | -2.060960 | -1.027212 |
| H | 0.783784  | 0.427707  | -2.981483 |
| O | 1.798819  | 2.442138  | 0.134675  |
| H | 1.946235  | 2.905361  | 0.968453  |
| H | 2.679398  | 2.217209  | -0.192328 |

**TS3-Pd**

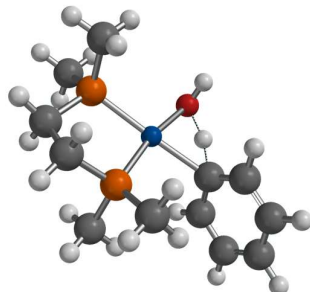

39

|    |           |           |           |
|----|-----------|-----------|-----------|
| Pd | 0.366496  | 0.873215  | 0.209174  |
| P  | -1.355495 | 1.520783  | 1.592670  |
| P  | -0.871657 | -0.986149 | -0.111851 |
| C  | -2.748067 | 0.339289  | 1.386279  |
| H  | -3.330516 | 0.674480  | 0.516139  |
| H  | -3.415970 | 0.384580  | 2.257141  |
| C  | -2.190589 | -1.056573 | 1.163877  |
| H  | -2.966908 | -1.770925 | 0.856742  |

|   |           |           |           |
|---|-----------|-----------|-----------|
| H | -1.732039 | -1.452848 | 2.081393  |
| C | 0.002314  | -2.568090 | -0.066519 |
| H | 0.710239  | -2.615771 | -0.902505 |
| H | -0.717936 | -3.391798 | -0.156690 |
| H | 0.556337  | -2.669624 | 0.873300  |
| C | -1.730583 | -0.953125 | -1.708241 |
| H | -0.996880 | -0.952298 | -2.522569 |
| H | -2.349053 | -0.052480 | -1.793135 |
| H | -2.369682 | -1.841341 | -1.801643 |
| C | -0.899121 | 1.449202  | 3.346928  |
| H | -0.067353 | 2.135894  | 3.542691  |
| H | -0.584453 | 0.434444  | 3.615940  |
| H | -1.757100 | 1.738406  | 3.968461  |
| C | -2.020190 | 3.182183  | 1.327628  |
| H | -2.387443 | 3.279920  | 0.300049  |
| H | -1.228237 | 3.922476  | 1.491214  |
| H | -2.842461 | 3.377385  | 2.028713  |
| C | 1.822349  | 0.198101  | -2.448863 |
| C | 3.594756  | -1.637947 | -1.318549 |
| C | 2.428421  | -0.764055 | -3.254103 |
| C | 2.082874  | 0.262113  | -1.065757 |
| C | 2.978529  | -0.678137 | -0.518840 |
| C | 3.313400  | -1.684067 | -2.686381 |
| H | 2.215625  | -0.799813 | -4.324285 |
| H | 3.203917  | -0.650878 | 0.551309  |
| H | 3.788403  | -2.440277 | -3.314276 |
| H | 4.291814  | -2.354668 | -0.880163 |
| H | 1.135637  | 0.917983  | -2.903667 |
| O | 1.729523  | 2.555980  | 0.168935  |
| H | 2.091041  | 1.501620  | -0.482912 |
| H | 2.250059  | 2.572810  | 0.982366  |

**[Pd(OH)(Ph-H)(DMPE)]<sup>+</sup>**

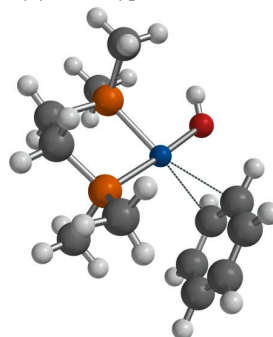

39

|    |           |           |           |
|----|-----------|-----------|-----------|
| Pd | 0.588491  | 0.770188  | 0.283956  |
| P  | -1.124407 | 1.366117  | 1.621037  |
| P  | -0.719568 | -1.042750 | -0.268951 |
| C  | -2.573100 | 0.309106  | 1.251450  |
| H  | -3.082901 | 0.755489  | 0.385758  |



|   |           |           |           |
|---|-----------|-----------|-----------|
| H | -3.275518 | 0.345477  | 2.095637  |
| C | -2.099814 | -1.097678 | 0.947224  |
| H | -2.908323 | -1.731467 | 0.558046  |
| H | -1.712432 | -1.589640 | 1.851088  |
| C | -0.057044 | -2.731343 | -0.238048 |
| H | 0.593231  | -2.908859 | -1.099662 |
| H | -0.895091 | -3.439897 | -0.278147 |
| H | 0.514872  | -2.898682 | 0.681423  |
| C | -1.540984 | -0.891949 | -1.882827 |
| H | -0.797972 | -0.917042 | -2.687579 |
| H | -2.085055 | 0.057746  | -1.943105 |
| H | -2.246113 | -1.722305 | -2.020536 |
| C | -0.731585 | 1.125660  | 3.371573  |
| H | 0.141692  | 1.728675  | 3.645214  |
| H | -0.506798 | 0.071638  | 3.569064  |
| H | -1.589667 | 1.435448  | 3.983178  |
| C | -1.661301 | 3.081399  | 1.450457  |
| H | -1.924943 | 3.291278  | 0.408309  |
| H | -0.858155 | 3.759679  | 1.757869  |
| H | -2.538334 | 3.249310  | 2.089952  |
| C | 1.828952  | 0.265192  | -2.818015 |
| C | 3.142285  | -1.223296 | -0.839983 |
| C | 2.083280  | -1.087534 | -3.012408 |
| C | 2.245867  | 0.892977  | -1.634258 |
| C | 2.901409  | 0.144134  | -0.638679 |
| C | 2.746640  | -1.829165 | -2.026598 |
| H | 1.771094  | -1.573291 | -3.938512 |
| H | 3.283812  | 0.649521  | 0.248858  |
| H | 2.947489  | -2.889371 | -2.189823 |
| H | 3.661164  | -1.800436 | -0.073302 |
| H | 1.324755  | 0.847529  | -3.590715 |
| O | 1.649070  | 2.435748  | 0.829427  |
| H | 1.369873  | 2.821031  | 1.664710  |
| H | 2.135128  | 1.971360  | -1.513081 |

**Cis-[Pd( $\mu$ -OH)(DMPE)]<sub>2</sub><sup>2+</sup>**

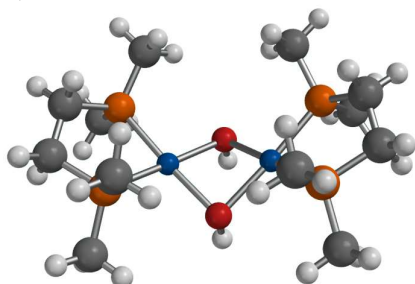

54

|   |           |          |           |
|---|-----------|----------|-----------|
| H | 1.450035  | 3.397978 | 0.378502  |
| H | -1.474633 | 3.383357 | 0.353295  |
| H | 0.012105  | 1.508250 | -2.373101 |
| O | 0.004807  | 1.454465 | -1.409355 |

|    |           |           |           |
|----|-----------|-----------|-----------|
| C  | 4.497126  | -0.662427 | 0.452164  |
| C  | 4.157807  | 0.684830  | 1.067136  |
| C  | 2.148537  | 2.832099  | 1.004939  |
| C  | 3.845182  | 2.386371  | -1.294556 |
| C  | 2.305708  | -2.339067 | 1.440761  |
| C  | 3.386754  | -2.828986 | -1.192304 |
| H  | 5.096141  | -0.540844 | -0.461841 |
| H  | 5.076782  | -1.298139 | 1.134946  |
| H  | 3.701422  | 0.562789  | 2.059894  |
| H  | 5.045062  | 1.319425  | 1.195882  |
| H  | 4.524281  | 3.125012  | -0.848451 |
| H  | 3.036148  | -3.073342 | 1.805091  |
| Pd | 1.478629  | 0.014507  | -0.805090 |
| P  | 2.921579  | 1.537058  | 0.010277  |
| P  | 2.945238  | -1.511847 | -0.037883 |
| C  | -4.165941 | 0.649004  | 1.022236  |
| C  | -4.493825 | -0.697829 | 0.400114  |
| C  | -3.364895 | -2.840464 | -1.261419 |
| C  | -2.300234 | -2.377987 | 1.382752  |
| C  | -3.855616 | 2.356201  | -1.335565 |
| C  | -2.175944 | 2.814551  | 0.973835  |
| H  | -3.711832 | 0.525493  | 2.015811  |
| H  | -5.057956 | 1.276877  | 1.150814  |
| H  | -5.090709 | -0.576145 | -0.515305 |
| H  | -5.071580 | -1.340535 | 1.077986  |
| H  | -3.030091 | -3.118802 | 1.734835  |
| H  | -4.543651 | 3.088283  | -0.892334 |
| Pd | -1.468582 | 0.004126  | -0.829412 |
| P  | -2.935053 | -1.535320 | -0.089051 |
| P  | -2.931657 | 1.513761  | -0.026526 |
| H  | -2.462807 | -3.402389 | -1.528387 |
| H  | 2.488111  | -3.397161 | -1.457784 |
| H  | 0.024048  | -1.465478 | -2.420774 |
| O  | 0.015064  | -1.416076 | -1.457153 |
| H  | -1.631429 | 2.371481  | 1.815118  |
| H  | -2.950711 | 3.491506  | 1.356748  |
| H  | -2.103654 | -1.654208 | 2.181832  |
| H  | -1.363438 | -2.888270 | 1.131383  |
| H  | 2.103637  | -1.606279 | 2.230246  |
| H  | 1.371381  | -2.855221 | 1.192359  |
| H  | 4.112794  | -3.505870 | -0.723096 |
| H  | 3.822708  | -2.403729 | -2.102791 |
| H  | 4.427858  | 1.665755  | -1.879326 |
| H  | 3.145732  | 2.899441  | -1.964794 |
| H  | 2.915645  | 3.512898  | 1.396251  |
| H  | 1.598357  | 2.384936  | 1.840346  |
| H  | -3.157173 | 2.876258  | -2.001387 |
| H  | -4.428753 | 1.631262  | -1.924449 |
| H  | -3.797438 | -2.406201 | -2.169287 |
| H  | -4.091077 | -3.525358 | -0.804131 |

**Trans-[Pd( $\mu$ -OH)(DMPE)]<sub>2</sub><sup>2+</sup>**

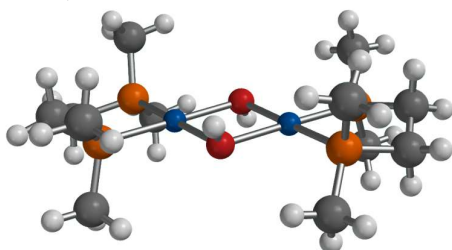

54

|    |           |           |           |
|----|-----------|-----------|-----------|
| Pd | 0.000032  | -0.003626 | 1.603087  |
| P  | -1.520934 | 0.010286  | 3.262624  |
| P  | 1.520377  | -0.008582 | 3.263410  |
| C  | -0.680057 | -0.338533 | 4.855942  |
| H  | -0.577254 | -1.430381 | 4.932954  |
| H  | -1.310736 | -0.012638 | 5.694085  |
| C  | 0.678438  | 0.340803  | 4.856190  |
| H  | 1.308750  | 0.014698  | 5.694618  |
| H  | 0.575895  | 1.432682  | 4.933290  |
| C  | -2.290680 | 1.640890  | 3.432591  |
| H  | -1.530524 | 2.398892  | 3.652664  |
| H  | -3.029435 | 1.621933  | 4.244749  |
| H  | -2.792118 | 1.909183  | 2.495556  |
| C  | -2.884846 | -1.165519 | 3.104613  |
| H  | -2.497934 | -2.187305 | 3.025220  |
| H  | -3.470156 | -0.932820 | 2.207583  |
| H  | -3.539707 | -1.092174 | 3.982857  |
| C  | 2.881285  | 1.170470  | 3.103817  |
| H  | 3.467586  | 0.937975  | 2.207412  |
| H  | 3.536009  | 1.100220  | 3.982428  |
| H  | 2.491720  | 2.191161  | 3.022597  |
| C  | 2.294119  | -1.636952 | 3.436311  |
| H  | 2.796073  | -1.905804 | 2.499706  |
| H  | 1.535713  | -2.396300 | 3.657896  |
| H  | 3.032865  | -1.614731 | 4.248376  |
| O  | -1.407895 | 0.030507  | -0.001128 |
| H  | -1.986804 | -0.739912 | -0.004183 |
| O  | 1.407747  | -0.050587 | -0.000859 |
| H  | 1.995147  | 0.713363  | -0.004695 |
| Pd | 0.000321  | -0.004956 | -1.606216 |
| P  | -1.522534 | -0.031257 | -3.263973 |
| P  | 1.522484  | 0.029755  | -3.264484 |
| C  | 2.875782  | -1.154066 | -3.086222 |
| H  | 3.541587  | -1.092327 | -3.957017 |
| H  | 2.477859  | -2.171248 | -3.003743 |
| H  | 3.447990  | -0.922219 | -2.180878 |
| C  | 2.303257  | 1.654071  | -3.452813 |
| H  | 3.037386  | 1.621296  | -4.268825 |

|   |           |           |           |
|---|-----------|-----------|-----------|
| H | 2.814201  | 1.930637  | -2.523057 |
| H | 1.547320  | 2.415069  | -3.676847 |
| C | 0.682278  | -0.329396 | -4.856321 |
| H | 1.308018  | 0.002348  | -5.695966 |
| H | 0.590953  | -1.422386 | -4.932191 |
| C | -2.303208 | -1.654780 | -3.459155 |
| H | -1.547331 | -2.414743 | -3.687012 |
| H | -3.037935 | -1.618527 | -4.274534 |
| H | -2.813490 | -1.935443 | -2.530283 |
| C | -0.683087 | 0.335581  | -4.854461 |
| H | -0.591657 | 1.428914  | -4.924882 |
| H | -1.309195 | 0.008153  | -5.695451 |
| C | -2.875889 | 1.151419  | -3.079150 |
| H | -3.542586 | 1.093309  | -3.949498 |
| H | -2.478247 | 2.168380  | -2.992464 |
| H | -3.446953 | 0.915217  | -2.174267 |

**[Pd(CH<sub>2</sub>CMe<sub>2</sub>Ph)(PMe<sub>3</sub>)(DMPE)]<sup>+</sup>**

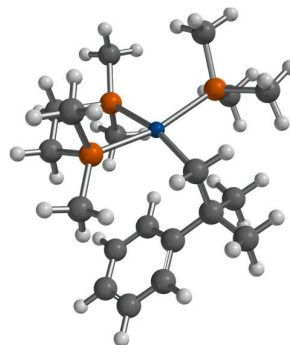

61

|    |           |           |           |
|----|-----------|-----------|-----------|
| Pd | 0.514373  | -0.622437 | 0.290415  |
| P  | -1.593158 | -1.600320 | 0.080663  |
| P  | -0.102971 | -0.473137 | 2.599515  |
| C  | -2.582597 | -1.222042 | 1.585268  |
| H  | -3.458372 | -1.884786 | 1.632448  |
| H  | -2.963128 | -0.195803 | 1.471445  |
| C  | -1.713598 | -1.350545 | 2.824656  |
| H  | -1.480215 | -2.405613 | 3.028463  |
| H  | -2.219760 | -0.960963 | 3.719212  |
| C  | -2.755108 | -1.418264 | -1.300638 |
| H  | -3.173804 | -0.406725 | -1.318330 |
| H  | -3.570780 | -2.144489 | -1.191528 |
| H  | -2.243814 | -1.601841 | -2.252909 |
| C  | -1.333372 | -3.402929 | 0.172192  |
| H  | -0.831241 | -3.744581 | -0.740796 |
| H  | -2.292200 | -3.929687 | 0.269603  |
| H  | -0.693309 | -3.656217 | 1.025336  |
| C  | -0.538741 | 1.267481  | 2.943667  |
| H  | 0.335562  | 1.913503  | 2.799218  |

|   |           |           |           |
|---|-----------|-----------|-----------|
| H | -0.900428 | 1.379582  | 3.974061  |
| H | -1.326052 | 1.602139  | 2.258446  |
| C | 0.831078  | -0.954185 | 4.089475  |
| H | 1.124707  | -2.008882 | 4.033953  |
| H | 0.214566  | -0.802938 | 4.985183  |
| H | 1.735034  | -0.340668 | 4.182639  |
| C | 0.674508  | -0.429898 | -1.821068 |
| H | -0.017919 | -1.124880 | -2.319817 |
| H | 1.686247  | -0.729135 | -2.129718 |
| C | 0.405609  | 0.999668  | -2.343340 |
| C | -1.046112 | 1.413183  | -2.087938 |
| C | -3.717064 | 2.202113  | -1.559647 |
| C | -1.462154 | 1.781616  | -0.797683 |
| C | -2.007049 | 1.459069  | -3.105363 |
| C | -3.324133 | 1.847697  | -2.848323 |
| C | -2.773519 | 2.166321  | -0.530748 |
| H | -0.739093 | 1.772196  | 0.020452  |
| H | -4.046081 | 1.872270  | -3.666698 |
| H | -3.059496 | 2.446487  | 0.485274  |
| H | -4.743999 | 2.510024  | -1.357378 |
| C | 0.725250  | 0.995811  | -3.843022 |
| H | 0.161359  | 0.226624  | -4.385656 |
| H | 1.791514  | 0.783771  | -3.992988 |
| H | 0.509090  | 1.967200  | -4.310233 |
| C | 1.333865  | 2.027803  | -1.684683 |
| H | 2.384542  | 1.782708  | -1.881491 |
| H | 1.204498  | 2.076989  | -0.596469 |
| H | 1.153203  | 3.033552  | -2.087577 |
| H | -1.735468 | 1.190131  | -4.126010 |
| P | 2.832621  | -0.285729 | 0.586914  |
| C | 3.378758  | 1.256411  | 1.391954  |
| H | 4.462167  | 1.234205  | 1.568324  |
| H | 2.865758  | 1.376425  | 2.353805  |
| H | 3.140921  | 2.121873  | 0.762777  |
| C | 3.953208  | -0.438029 | -0.844985 |
| H | 4.994019  | -0.346951 | -0.508966 |
| H | 3.818796  | -1.421144 | -1.312260 |
| H | 3.758371  | 0.328716  | -1.601128 |
| C | 3.508440  | -1.578830 | 1.683711  |
| H | 3.303071  | -2.569259 | 1.261014  |
| H | 3.048945  | -1.526086 | 2.675268  |
| H | 4.594653  | -1.458575 | 1.792037  |

[Pd(Ph)(PMe<sub>3</sub>)(DMPE)]<sup>+</sup>

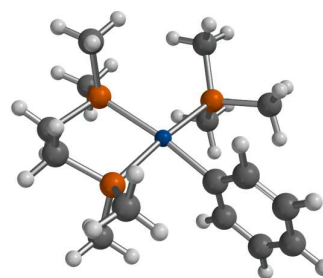

49

|    |           |           |           |
|----|-----------|-----------|-----------|
| Pd | -0.104085 | 0.098972  | -0.008303 |
| P  | -2.351894 | 0.610997  | 0.577428  |
| P  | 0.339301  | 0.441923  | 2.247131  |
| C  | -2.410099 | 0.614007  | 2.424178  |
| H  | -2.516745 | -0.434824 | 2.738753  |
| H  | -3.311241 | 1.141293  | 2.767738  |
| C  | -1.145691 | 1.222828  | 3.006458  |
| H  | -1.107777 | 1.118777  | 4.100092  |
| H  | -1.089521 | 2.299029  | 2.785706  |
| C  | -2.914189 | 2.285170  | 0.126758  |
| H  | -2.202477 | 3.031155  | 0.500101  |
| H  | -3.904196 | 2.489552  | 0.555562  |
| H  | -2.970598 | 2.384999  | -0.963237 |
| C  | -3.747986 | -0.462946 | 0.117443  |
| H  | -3.531027 | -1.497621 | 0.407623  |
| H  | -3.911490 | -0.434949 | -0.965853 |
| H  | -4.667869 | -0.135561 | 0.619273  |
| C  | 1.747651  | 1.467032  | 2.750917  |
| H  | 2.679355  | 0.973939  | 2.448938  |
| H  | 1.750874  | 1.605605  | 3.839677  |
| H  | 1.697482  | 2.446233  | 2.261099  |
| C  | 0.565804  | -1.115877 | 3.156491  |
| H  | 1.452850  | -1.635478 | 2.775002  |
| H  | -0.303516 | -1.768571 | 3.014596  |
| H  | 0.698155  | -0.919682 | 4.228589  |
| C  | 2.361657  | -1.652113 | -0.139975 |
| C  | 4.181664  | 0.346713  | -0.795860 |
| C  | 3.706280  | -1.972753 | -0.351447 |
| C  | 1.902089  | -0.332870 | -0.261108 |
| C  | 2.836468  | 0.661188  | -0.585080 |
| C  | 4.621712  | -0.973371 | -0.683446 |
| H  | 4.037918  | -3.009626 | -0.257784 |
| H  | 2.517986  | 1.703454  | -0.682692 |
| H  | 5.671720  | -1.220741 | -0.850694 |
| H  | 4.890035  | 1.138668  | -1.051157 |
| H  | 1.663308  | -2.455101 | 0.116237  |
| P  | -0.425520 | -0.398298 | -2.292208 |
| C  | 1.027253  | -0.269994 | -3.381127 |
| H  | 1.419379  | 0.753890  | -3.365973 |
| H  | 0.751980  | -0.534104 | -4.410459 |

|   |           |           |           |
|---|-----------|-----------|-----------|
| H | 1.818691  | -0.944128 | -3.033362 |
| C | -1.683606 | 0.571392  | -3.185644 |
| H | -1.413490 | 1.634085  | -3.175344 |
| H | -2.664369 | 0.459451  | -2.709766 |
| H | -1.758477 | 0.234752  | -4.227992 |
| C | -0.968353 | -2.122059 | -2.515361 |
| H | -0.216944 | -2.803112 | -2.097680 |
| H | -1.100970 | -2.350772 | -3.581332 |
| H | -1.917482 | -2.290549 | -1.992909 |
